# Supplementary material for: The second messenger signaling molecule cyclic di-AMP drives developmental cycle progression in Chlamydia trachomatis
Source: eLife. 2025 Sep 10;14:RP104240. doi: 10.7554/eLife.104240 (PMC12422730; doi:10.7554/eLife.104240)
Supplement: Figure 1—source data 1. [file elife-104240-fig1-data1.xlsx]

## Sheet: Figure 1
	16	24	Average	16	24	Stdev	16	24	p-value	16	24
mCherry	292.64	2253.38		244.521	1701.81		72.5601	489.643		N/A	N/A
	279.862	1533.61							16-24	0.00698609
	161.061	1318.44
dacA	1105.51	5254.99		1040	5040.6		61.3579	707.967		0.000131549	0.00255611
	983.873	5616.59
	1030.63	4250.21
dacA_D164N	121.685	335.629		115.584	320.584		5.96828	21.0577		0.0373862	0.00815242
	109.758	329.605
	115.308	296.519
dTM_dacA	941.502	6753.61		1002.03	6605.15		114.425	128.802		0.00063642	7.40212e-05
	930.589	6523.26
	1134.01	6538.57
dTM_dacAD164N	242.656	2350.65		225.615	2281.81		16.5898	64.6555		0.682708	0.111702
	224.672	2272.4
	209.517	2222.37
ybbR_6xH	294.944	3769.69		246.816	2600.59		59.232	1183.44		0.968176	0.291011
	180.667	1403.3
	264.838	2628.77
dacA_ybbR6xH	7058.39	378914		8263.42	337499		2712.43	45942.6		0.00689226	0.000224237
	11369.6	288081
	6362.29	345503
dacAD164N_ybbR6xH	88.8428	307.988		102.178	432.255		13.6628	136.152		0.0288592	0.0123816
	101.544	410.988
	116.146	577.79
dacA-KD	233.851	487.689		216.982	508.238		60.2484	111.232		0.639625	0.0146458
	266.997	628.312
	150.097	408.714
dacA-KD_dacAop	4065.54	10258.6		3736.25	10416.2		362.028	222.912		8.13223e-05	0.00018651
	3794.63
	3348.58	10573.8
Uninfected HeLa	89.4043	84.2924		91.1201	94.4181		10.6692	18.0399		0.0223016	0.00473557
	81.4128	83.7158
	102.543	115.246
