# Supplementary material for: The second messenger signaling molecule cyclic di-AMP drives developmental cycle progression in Chlamydia trachomatis
Source: eLife. 2025 Sep 10;14:RP104240. doi: 10.7554/eLife.104240 (PMC12422730; doi:10.7554/eLife.104240)
Supplement: Figure 2—figure supplement 2—source data 1. [file elife-104240-fig2-figsupp2-data1.xlsx]

## Sheet: Organism Size
			dacA							dacAD164N
			UI	I						UI	I
1	1	1	0.901	1.535	1	1	1	1	1	1.003	1.687	1	1
		2	0.605	1.602					2	1.003	1.767
		3	0.537	1.416					3	0.985	1.733
		4	0.686	1.3					4	0.79	2.61	2
		5	0.915	1.803					5	0.907	2.285
		6	0.736	2.292	2				6	0.836	2.516
		7	0.649	2.218					7	0.852	3.118	3
		8	1.255	2.073					8	0.852	2.344
		9	0.894	2.176					9	0.731	2.494	4
		10	1.121	1.683					10	0.703	2.335
		11	0.906	1.988	3			2	11	1.047	2.749
		12	1.055	2.1	4				12	0.781	2.313	5
	2	13	0.8	1.282					13	0.833	2.725
		14	0.72	1.5					14	0.8	2.179	6	2
		15	0.682	2.625	5				15	0.775	2.568
		16	0.855	1.9					16	0.981	2.353
		17	0.98	2.403	6				17	0.867	2.593
		18	0.798	2.39					18	0.694	2.054
		19	0.895	2.527					19	0.66	2.552	7
		20	0.9	1.934					20	0.817	2.404
		21	0.797	2.071	7				21	0.833	2.863
		22	0.896	1.485					22	0.615	2.383	8
		23	0.843	1.894	8				23	1.331	2.518
		24	0.743	1.745					24	0.807	1.795
	3	25	1.721	2.587	9				25	0.806	1.893
		26	1.55	2.681					26	0.775	2.899	9
		27	1.047	2.539	10				27	0.869	1.825
		28	1	3.042	11				28	0.852	1.503
		29	1.182	2.695	12			3	29	1.307	1.321
		30	0.731	1.557	13				30	0.767	2.378	10	3
		31	1.076	1.903					31	1.034	2.515
		32	0.854	1.3	14				32	0.641	1.866
		33	0.888	1.016					33	0.626	2.451
		34	0.915	1.171					34	1.042	2.593	11
		35	0.85	1.562					35	0.435	1.995
		36	0.85	1.6					36	0.713	2.247
	4	37	0.907	1.628	15				37	0.901	2.832	12
		38	0.985	1.804					38	0.857	1.668
		39	0.875	1.434					39	0.732	3.5	13
		40	0.91	2.34					40	0.907	2.961
		41	1.476	1.611	16				41	0.994	2.599
		42	0.915	1.025					42	0.713	1.694	14
		43	0.613	1.574					43	0.85	1.499
		44	1.064	1.866					44	0.792	1.23	15
		45	0.91	1.531					45	0.713	1.622
		46	0.667	2.215	17				46	0.582	1.333
		47	1.061	1.91					47	0.767	0.957
		48	1.443	1.266				4	48	1.118	2.676	16
		49	0.641	1.542					49	0.806	2.467
		50	0.889	1.697					50	1.044	1.698	17
		51	0.926	1.595					51	0.657	1.944
		52	0.915	1.858	18				52	0.703	2.735
		53	0.731	1.402					53	0.703	1.509
		54	1.02	1.501					54	0.67	1.625	18
	5	55	1.027	1.321					55	0.803	1.985
		56	0.762	1.367					56	0.62	3.041
		57	0.709	1.719					57	0.543	2.476	19
		58	0.78	1.364					58	0.6	1.684
		59	0.761	1.783					59	0.686	1.334
		60	0.778	1.77	19				60	0.889	1.535
		61	1.267	1.894					61	0.732	1.938	20
		62	0.716	1.675					62	1.297	1.79
		63	0.749	1.498					63	0.857	2.38	21
		64	0.781	2.062					64	0.833	2.052
		65	0.775	1.416					65	0.629	1.963
		66	0.807	1.329					66	0.792	1.98	22
		67	0.667	1.913					67	0.72	2.147
		68	0.721	1.291					68	0.778	1.469
		69	0.967	1.511					69	0.806	1.969	23
		70	0.907	2.177	20				70	0.718	1.849
		71	0.817	1.872	21				71	0.674	1.417
		72	0.647	2.14					72	0.568	2.279	24
		73	0.568	1.91	22				73	0.807	1.424
		74	0.674	1.54					74	0.6	1.229
		75	0.749	1.98	23	2			75	1.005	2.677	25
	6	76	0.828	1.562					76	0.731	2.632
		77	0.749	1.14					77	0.522	2.4	26
		78	0.875	2.14	24				78	0.825	1.787
		79	0.927	2.125				5	79	1.37	1.332
		80	0.76	2.697	25				80	1.073	2.707	27
		81	0.915	1.652					81	1	2.582	28
		82	0.626	1.7					82	0.872	1.628
		83	0.92	2.015	26				83	0.96	1.501
		84	0.778	1.655	27				84	0.828	1.23
		85	0.694	1.652					85	0.703	1.675
		86	0.57	1.322			2	6	86	1.118	1.909
		87	0.749	2.364					87	1.12	2.167
		88	1.082	1.145					88	0.926	2.647	29
		89	0.777	1.935	28				89	0.994	2.015	30
2	7	90	0.972	1.862					90	1.134	2.899
		91	0.969	2.442	29				91	0.781	2.042
		92	0.902	1.776					92	1.03	2.806	31
		93	0.64	1.997	30			7	93	1.167	2.049
		94	0.77	1.79					94	1.24	1.777
		95	0.734	1.537					95	1.086	3.081	32
		96	0.707	1.258					96	1.027	2.434
		97	0.854	1.88	31				97	1.221	2.737
		98	0.792	1.929					98	1.182	2.191	33
	8	99	1.055	1.796					99	0.836	2.173
		100	0.851	1.361	32				100	0.933	1.823	34
		101	1.151	1.77					101	0.897	2.004
		102	1.237	2.121	33				102	0.762	1.8
		103	0.718	2.163					103	1.014	3.585	35
		104	0.835	2.305	34				104	1.208	2.404
		105	0.713	2.08				8	105	1.391	2.491
		106	0.731	1.557					106	1.342	2.197
		107	0.943	1.734					107	0.91	2.03
		108	0.76	2.424	35	3			108	0.974	2.256	36
		109	0.779	1.413					109	0.907	3.33
		110	0.76	1.794	36				110	1.128	2.341
		111	0.777	1.779					111	0.777	2.043
		112	0.633	1.443	37				112	1.054	1.768
	9	113	1.148	0.939					113	0.922	2.302	37
		114	0.981	1.6	38			9	114	0.93	2.45
		115	1.14	1.887					115	0.98	2.4
		116	0.883	2.123					116	1.12	2.43	38
		117	0.955	1.808			3	10	117	1.073	2.81
		118	0.955	1.108					118	0.872	2.259
		119	0.967	1.415					119	0.991	1.79	39
		120	1.023						120	1.038	3.023
		121	0.875						121	0.955	2.797
		122	0.86						122	1.075	2.913	40
		123	0.994						123	1.038	2.202
3	10	124	1.466						124	1.191	3	41
		125	1.034						125	1.075	1.803
		126	1.178						126	0.767	2.247
		127	1.26						127	0.823	2.016
		128	1.018					11	128	1.085	1.931
		129	0.889						129	1.674	1.498
		130	1.276						130	1.255	1.408
		131	1.101						131	1.297	2.438	42
		132	1.033						132	1.124	2.871
		133	1.018						133	0.841	2.239
		134	0.91						134	1.282	2.646	43
		135	1.104						135	1.202	3.523
		136	1.138						136	0.955	3.473
		137	1.226						137	0.675	2.14	44
		138	1.204						138	0.641	2.667
		139	0.823						139	0.869	2.119	45
		140	1.059						140	0.801	1.64
		141	0.833						141	0.756	2.02
		142	0.93						142	0.734	1.979
			0.902986	1.79093	1.98335				143	1.182	1.989
				1.36629e-48					144		1.772
									145		1.573
										0.902811	2.19608	2.43249
											7.14503e-57

## Sheet: Inclusion size
		dacA					dacAD164N
		UI	I				UI	I
qPCR_1	1	125.33	34.4		IFU_1	1	186.11	28.32
	2	72.66	42.98			2	176.18	32.12
	3	158.73	19.81			3	115.02	27.75
	4	177.36	22.85			4	150.36	35.4
	5	107.51	19.6			5	168.58	37.1
	6	160.89	37.33			6	185.47	79.56
	7	169.68	25.53			7	118.02	40.94
	8	40.82	18.3			8	135.53	28.9
	9	83.76	24.07			9	109.47	37.89
	10	91.17	36.77			10	150.09	18.75
	11	135.77	15.11			11	94.52	44.37
	12	200.66	23.32			12	121.78	44.4
	13	106.7	19.87			13	157.16	34.63
	14	79.26	22.26			14	200.84	23.02
	15	168.64	27.81			15	106.6	40.7
	16	114.68	19.14			16	110.53	43.58
	17	64.82	33.76			17	122.12	34.33
	18	267.2	28.23			18	98.33	49.71
	19	163.19	18.77			19	85.34	45.06
	20	249.54	26.72			20	202.17	15.71	2
	21	231.64	19.02			21	141.23	18.97
	22	200.54	16.26			22	149.36	41.71
2	23	153.23	19.35			23	159.39	26.4
	24	144.97	31.99		2	24	142.93	14.69
	25	121.17	12.61			25	75.33	39.34
	26	171.36	49.31	2		26	98.14	69.32
	27	203.47	56.46			27	154.94	42.44
	28	181.9	15.95			28	152.69	25.99
	29	98.37	20.06			29	69.86	21.62
	30	109.91	31.54			30	184.84	70.42
	31	188.8	29			31	207.64	27.49
	32	229.69	16.02			32	184.69	31.66
	33	116.67	37.19			33	200.58	87.92
	34	159.03	14.28			34	108.11	37.66
	35	227.13	24.94			35	143.05	35.88
	36	148.49	19.79			36	181.83	57.12
	37	152.45	33.99			37	212.19	31.42
	38	168.88	16.24			38	202.35	39.55
	39	150.65	13.15			39	123.66	36.11	3
	40	103.44	18.23			40	227.37	23.24
	41	150.08	26.29			41	190.72	22.77
	42	91.96	22.19			42	150.76	19.2
3	43	167.94	15.99			43	77.29	21.82
	44	115.01	36.95			44	73.52	43.47
	45	162.96	11.88		3	45	172.58	17.14
	46	137.54	29.71			46	216.75	20.88
	47	111.03	53.56			47	102.1	19.8
	48	174.22	20.47			48	174.85	71.46
	49	145.59	28.48			49	135.95	23.78
	50	199.35	21.1			50	157.68	34.18
	51	78.93	35.71			51	251.28	24.51
	52	145.73	20.98			52	99.19	21.68
	53	92.94	30.61			53	122.41	43.92
	54	200.07	46.03			54	187.27	76.74
	55	131.86	22.81				148.644	36.7137	4.04872
	56	192.69	13.12					8.12381e-33
		148.18	25.8552	5.73114
			2.6495e-35
