# Supplementary material for: The second messenger signaling molecule cyclic di-AMP drives developmental cycle progression in Chlamydia trachomatis
Source: eLife. 2025 Sep 10;14:RP104240. doi: 10.7554/eLife.104240 (PMC12422730; doi:10.7554/eLife.104240)
Supplement: Figure 2—figure supplement 3—source data 1. [file elife-104240-fig2-figsupp3-data1.xlsx]

## Sheet: ybbR_6xH_IFU
	pBOMBL-ybbR_6xH
		Raw		Relative
		UI	I	UI	I
	IFU-1	541000000	117000000	100	21.6266
	IFU-2	207000	96800	100	46.7633
	IFU-3	400752	181984	100	45.4106
	IFU-4
	Average			100	37.9335
	STDEV			0	14.1384
	P-value				0.00160541
YbbR_6xH		UI	I
	Average	100	37.9335
	STDEV	0	14.1384

## Sheet: ybbR_6xH_qPCR
dacA				Average
	10	14	24		10	14	24
UI-1	0.0643267	0.0889495	0.029309	UI	0.047023	0.0518257	0.0247035
UI-4	0.0313647	0.0258505	0.0289585	I	0.047023	0.0527364	0.0283039
UI-5	0.0453776	0.0406772	0.0158428
				STDEV
I-1	0.0643267	0.0860088	0.0303603		10	14	24
I-4	0.0313647	0.0312487	0.0172352	UI	0.0165425	0.0329938	0.00767553
I-5	0.0453776	0.0409519	0.0373161	I	0.0165425	0.0292203	0.0101972
				P-value	10	14	24
					1	0.973164	0.650702
ybbR				Average
	10	14	24		10	14	24
UI-1	0.0222056	0.0290141	0.0113713	UI	0.0175197	0.0177329	0.00917103
UI-4	0.012434	0.00957249	0.0105946	I	0.0175197	0.0500931	0.0231142
UI-5	0.0179195	0.0146122	0.00554716
				STDEV
I-1	0.0222056	0.0776188	0.0287182		10	14	24
I-4	0.012434	0.030999	0.0117394	UI	0.00489804	0.0100895	0.0031623
I-5	0.0179195	0.0416615	0.0288851	I	0.00489804	0.0244268	0.00985127
				P-value	10	14	24
					1	0.101252	0.0798853
omcB				Average
	10	14	24		10	14	24
UI-1	0.00549291	0.00491205	0.0371692	UI	0.00273991	0.00254056	0.0293585
UI-4	0.00119905	0.00100308	0.0349202	I	0.00273991	0.0027897	0.0295111
UI-5	0.00152778	0.00170655	0.0159861
				STDEV
I-1	0.00549291	0.0048808	0.0346251		10	14	24
I-4	0.00119905	0.00152672	0.0142175	UI	0.00238983	0.00208367	0.0116353
I-5	0.00152778	0.00196158	0.0396908	I	0.00238983	0.00182395	0.0134847
				P-value	10	14	24
					1	0.883716	0.98887
hctA				Average
	10	14	24		10	14	24
UI-1	0.00804549	0.00422292	0.157958	UI	0.00656089	0.00300294	0.153412
UI-4	0.00457628	0.00176035	0.198926	I	0.00656089	0.00290155	0.146358
UI-5	0.00706091	0.00302554	0.103351
				STDEV
I-1	0.00804549	0.00373755	0.113985		10	14	24
I-4	0.00457628	0.00188529	0.112223	UI	0.00178784	0.00123144	0.0479494
I-5	0.00706091	0.00308181	0.212867	I	0.00178784	0.000939194	0.0576054
				P-value	10	14	24
					1	0.915186	0.878421
euo				Average
	10	14	24		10	14	24
UI-1	0.111516	0.0637928	0.00974578	UI	0.05626	0.0315863	0.00778161
UI-4	0.0246227	0.0118536	0.00920621	I	0.05626	0.0337209	0.0109288
UI-5	0.0326416	0.0191125	0.00439285
				STDEV
I-1	0.111516	0.0583117	0.0119374		10	14	24
I-4	0.0246227	0.0186522	0.00595838	UI	0.0480205	0.0281268	0.00294713
I-5	0.0326416	0.0241989	0.0148905	I	0.0480205	0.0214761	0.0045507
				P-value	10	14	24
					1	0.921819	0.371583
gDNA				Average
	10	14	24		10	14	24
UI-1	0.00309763	0.0136586	0.214023	UI	0.0263172	0.101217	1.39278
UI-4	0.0435803	0.158741	2.02521	I	0.0263172	0.0736834	1.47615
UI-5	0.0322736	0.131252	1.93909
				STDEV
I-1	0.00309763	0.0107486	0.140849		10	14	24
I-4	0.0435803	0.141673	2.82257	UI	0.0208883	0.0770637	1.02174
I-5	0.0322736	0.0686285	1.46501	I	0.0208883	0.0656085	1.3409
				P-value	10	14	24
					1	0.662045	0.935856
Copy #				Average
	10	14	24		10	14	24
UI-1	2759.46	12167.4	190658	UI	23444.1	90167.3	1.24072e+06
UI-4	38822.5	141411	1.80411e+06	I	23444.1	65639.3	1.31499e+06
UI-5	28750.2	116923	1.7274e+06
				STDEV
I-1	2759.46	9575.18	125472		10	14	24
I-4	38822.5	126206	2.51443e+06	UI	18607.9	68650.5	910192
I-5	28750.2	61136.2	1.30507e+06	I	18607.9	58445.9	1.19451e+06
				P-value	10	14	24
					1	0.662045	0.935856
