# Supplementary material for: The second messenger signaling molecule cyclic di-AMP drives developmental cycle progression in Chlamydia trachomatis
Source: eLife. 2025 Sep 10;14:RP104240. doi: 10.7554/eLife.104240 (PMC12422730; doi:10.7554/eLife.104240)
Supplement: Figure 2—figure supplement 4—source data 1. [file elife-104240-fig2-figsupp4-data1.xlsx]

## Sheet: EV_OGC
pBOMBL e.v.
	24 hpi (UI)	24 hpi (UI)	24 hpi (I)	24 hpi (I)	24 hpi (UI)	24 hpi (UI)	24 hpi (I)	24 hpi (I)	24 hpi (UI)	24 hpi (UI)	24 hpi (I)	24 hpi (I)			10	16	18	20	22	24	32	48
#1	8	10	9	11	7	8	3	4	9	11	3	5		UI	0	0	2645.87	75934.2	972302	9.46489e+06	2.70395e+08	1.25302e+09
#2	7	5	6	9	7	8	6	10	6	9	7	5		I	0	0	2678.13	145092	956169	8.35707e+06	227480000	1.4961e+09
#3	14	11	9	13	10	13	7	7	6	10	5	9
#4	12	8	5	6	10	8	5	5	10	9	8	8				UI-1	2807.2	93573.3	1.03576e+06	1.01317e+07	151008000	1.09707e+09
#5	11	10	12	15	6	8	6	5	12	9	7	9				UI-2	2323.2	77762.7	951867	8.97013e+06	3.25893e+08	1452000000
#6	8	12	12	14	7	10	13	11	12	7	10	10				UI-3	2807.2	56466.7	929280	9292800	3.34283e+08	1210000000
#7	9	13	8	18	7	12	8	3	9	7	8	7				Average	2645.87	75934.2	972302	9.46489e+06	2.70395e+08	1.25302e+09
#8	10	17	10	11	14	13	4	8	10	5	13	6				STDEV	279.438	18620.8	56104.4	599616	1.03477e+08	1.81336e+08
#9	9	13	11	12	11	9	5	6	9	13	10	10
#10	7	14	10	12	6	10	7	7	8	9	7	13				I-1	2484.53	152621	1.24549e+06	9.93813e+06	2.83947e+08	1.54557e+09
#11	11	14	10	10	6	18	6	10	14	6	6	10				I-2	3097.6	155203	764720	6.74373e+06	111320000	1364880000
#12	7	12	9	11	6	12	5	9	11	12	9	11				I-3	2452.27	127453	858293	8.38933e+06	2.87173e+08	1.57784e+09
#13	7	10	7	11	7	7	7	10	12	16	9	14				Average	2678.13	145092	956169	8.35707e+06	227480000	1.4961e+09
#14	12	11	7	12	9	8	8	7	12	10	11	12				STDEV	363.627	15330.3	254893	1.59744e+06	1.0061e+08	1.14777e+08
#15	10	12	9	9	13	8	10	7	6	9	10	8
Dilution	10^-3	10^-3	10^-3	10^-3	10^-3	10^-3	10^-3	10^-3	10^-3	10^-3	10^-3	10^-3
average (inclusions/FOV)	9.46667	11.4667	8.93333	11.6	8.4	10.1333	6.66667	7.26667	9.73333	9.46667	8.2	9.13333
IFU (/ml/well)	1.01317e+07		9.93813e+06		8.97013e+06		6.74373e+06		9292800		8.38933e+06
pBOMBL e.v.
	32 hpi (UI)	32 hpi (UI)	32 hpi (I)	32 hpi (I)	32 hpi (UI)	32 hpi (UI)	32 hpi (I)	32 hpi (I)	32 hpi (UI)	32 hpi (UI)	32 hpi (I)	32 hpi (I)
#1	7	6	16	9	49	31	18	15	16	35	9	21
#2	5	12	33	21	34	28	8	21	22	27	15	22
#3	13	9	37	26	44	36	12	18	25	31	23	28
#4	7	15	28	15	38	36	8	20	21	33	19	29
#5	10	18	41	24	33	31	12	12	25	38	22	31
#6	9	17	25	27	31	24	13	4	35	32	23	35
#7	20	17	35	28	39	30	5	3	29	44	24	29
#8	16	20	34	35	35	29	11	10	45	41	27	41
#9	15	28	35	29	38	38	14	7	35	43	35	31
#10	15	18	53	37	40	42	24	14	43	37	25	27
#11	17	21	24	27	33	25	11	7	24	45	25	56
#12	22	23	34	24	36	30	11	7	33	33	22	35
#13	30	15	33	31	41	24	9	13	46	47	43	47
#14	17	14	30	31	31	21	8	9	42	34	33	32
#15	10	22	34	24	33	30	9	12	44	31	35	46
Dilution	10^-4	10^-4	10^-4	10^-4	10^-4	10^-4	10^-4	10^-4	10^-4	10^-4	10^-4	10^-4
average (inclusions/FOV)	14.2	17	32.8	25.8667	37	30.3333	11.5333	11.4667	32.3333	36.7333	25.3333	34
IFU (/ml/well)	151008000		2.83947e+08		3.25893e+08		111320000		3.34283e+08		2.87173e+08
pBOMBL e.v.
	48 hpi (UI)	48 hpi (UI)	48 hpi (I)	48 hpi (I)	48 hpi (UI)	48 hpi (UI)	48 hpi (I)	48 hpi (I)	48 hpi (UI)	48 hpi (UI)	48 hpi (I)	48 hpi (I)
#1	7	13	15	16	10	8	13	13	12	12	14	19
#2	15	18	22	15	20	12	14	16	15	12	15	7
#3	11	12	20	24	20	17	12	20	5	10	18	14
#4	8	10	16	18	17	20	12	14	13	10	14	11
#5	6	10	23	13	27	18	13	21	11	12	18	11
#6	15	13	22	9	16	14	17	15	12	10	12	13
#7	17	11	20	15	21	16	12	20	10	11	19	17
#8	10	10	13	10	13	15	11	12	24	14	21	20
#9	9	13	17	10	7	13	11	13	13	15	21	14
#10	12	14	11	23	18	18	15	12	11	16	27	15
#11	7	15	15	14	8	14	14	8	13	15	13	13
#12	7	12	12	20	12	15	14	14	11	16	19	20
#13	11	13	21	18	16	18	10	15	13	12	14	25
#14	12	7	8	9	11	16	12	18	12	11	9	17
#15	14	8	16	14	7	13	17	15	10	14	18	21
Dilution	10^-5	10^-5	10^-5	10^-5	10^-5	10^-5	10^-5	10^-5	10^-5	10^-5	10^-5	10^-5
average (inclusions/FOV)	10.7333	11.9333	16.7333	15.2	14.8667	15.1333	13.1333	15.0667	12.3333	12.6667	16.8	15.8
IFU (/ml/well)	1.09707e+09		1.54557e+09		1452000000		1364880000		1210000000		1.57784e+09
pBOMBL e.v.
	18 hpi (UI)	18 hpi (UI)	18 hpi (I)	18 hpi (I)	18 hpi (UI)	18 hpi (UI)	18 hpi (I)	18 hpi (I)	18 hpi (UI)	18 hpi (UI)	18 hpi (I)	18 hpi (I)
#1	2	2	2	1	5	2	6	4	4	2	2	2
#2	4	3	2	3	2	1	3	3	4	2	4	2
#3	3	3	2	3	3	2	1	4	2	2	3	4
#4	2	6	3	2	1	3	4	4	3	3	3	2
#5	3	2	2	1	5	2	2	3	3	2	3	3
#6	3	1	2	2	2	3	5	3	2	3	2	4
#7	3	3	3	2	4	2	2	5	2	2	2	2
#8	4	2	2	2	2	3	3	2	1	4	1	4
#9	2	2	4	2	2	3	2	5	4	4	3	3
#10	3	3	2	2	2	1	3	2	4	3	4	2
#11	4	3	2	5	1	4	2	4	6	5	3	2
#12	7	2	4	1	3	4	2	5	2	3	2	2
#13	4	1	4	3	1	3	2	4	2	3	3	1
#14	4	3	5	2	1	2	2	3	1	4	2	2
#15	1	2	2	5	2	1	3	3	3	2	2	2
Dilution	10^0	10^0	10^0	10^0	10^0	10^0	10^0	10^0	10^0	10^0	10^0	10^0
average (inclusions/FOV)	3.26667	2.53333	2.73333	2.4	2.4	2.4	2.8	3.6	2.86667	2.93333	2.6	2.46667
IFU (/ml/well)	2807.2		2484.53		2323.2		3097.6		2807.2		2452.27
pBOMBL e.v.
	20 hpi (UI)	20 hpi (UI)	20hpi (I)	20hpi (I)	20 hpi (UI)	20 hpi (UI)	20hpi (I)	20hpi (I)	20 hpi (UI)	20 hpi (UI)	20hpi (I)	20hpi (I)
#1	12	8	20	17	11	7	21	21	5	7	21	5
#2	9	14	22	24	10	9	30	22	6	5	16	4
#3	11	14	26	22	12	9	33	23	4	7	13	7
#4	11	10	25	14	10	12	32	18	6	5	14	9
#5	10	6	23	13	7	10	18	10	3	10	16	7
#6	10	11	21	11	7	7	16	9	5	10	17	13
#7	7	12	15	12	5	6	25	10	4	4	18	12
#8	8	12	29	18	4	7	24	9	4	7	12	12
#9	10	8	20	10	8	8	22	9	10	8	15	14
#10	14	12	21	9	6	9	19	15	5	7	23	8
#11	8	12	22	6	11	11	12	5	6	5	11	13
#12	8	12	16	8	8	8	11	4	4	5	13	20
#13	5	6	6	10	5	4	8	7	4	3	13	11
#14	6	11	8	7	6	9	17	7	5	11	16	12
#15	8	5	6	12	6	9	15	9	7	3	17	13
Dilution	10^-1	10^-1	10^-1	10^-1	10^-1	10^-1	10^-1	10^-1	10^-1	10^-1	10^-1	10^-1
average (inclusions/FOV)	9.13333	10.2	18.6667	12.8667	7.73333	8.33333	20.2	11.8667	5.2	6.46667	15.6667	10.6667
IFU (/ml/well)	93573.3		152621		77762.7		155203		56466.7		127453
pBOMBL e.v.
	22 hpi (UI)	22 hpi (UI)	22 hpi (I)	22 hpi (I)	22 hpi (UI)	22 hpi (UI)	22 hpi (I)	22 hpi (I)	22 hpi (UI)	22 hpi (UI)	22 hpi (I)	22 hpi (I)
#1	10	10	13	13	9	17	4	7	10	6	11	8
#2	9	23	9	16	12	7	4	13	8	18	8	5
#3	14	9	16	8	12	6	7	8	11	7	5	8
#4	10	8	13	7	11	6	8	9	14	11	6	13
#5	12	12	6	14	6	7	9	11	12	10	8	6
#6	9	14	11	10	5	9	6	15	7	7	8	8
#7	8	5	10	11	8	8	5	11	6	6	11	10
#8	11	12	9	9	9	11	6	10	12	9	8	11
#9	7	9	13	17	12	11	4	10	12	10	14	16
#10	10	4	14	19	10	11	5	10	7	12	6	7
#11	11	11	15	22	13	7	5	10	7	10	11	10
#12	8	9	11	20	13	8	6	10	8	11	7	11
#13	11	20	12	22	12	8	5	5	7	11	10	5
#14	8	15	16	9	10	14	10	5	8	13	14	8
#15	12	10	9	12	11	12	11	8	11	7	8	5
Dilution	10^-2	10^-2	10^-2	10^-2	10^-2	10^-2	10^-2	10^-2	10^-2	10^-2	10^-2	10^-2
average (inclusions/FOV)	10	11.4	11.8	13.9333	10.2	9.46667	6.33333	9.46667	9.33333	9.86667	9	8.73333
IFU (/ml/well)	1.03576e+06		1.24549e+06		951867		764720		929280		858293
