# Supplementary material for: The second messenger signaling molecule cyclic di-AMP drives developmental cycle progression in Chlamydia trachomatis
Source: eLife. 2025 Sep 10;14:RP104240. doi: 10.7554/eLife.104240 (PMC12422730; doi:10.7554/eLife.104240)
Supplement: Figure 2—figure supplement 5—source data 1. [file elife-104240-fig2-figsupp5-data1.xlsx]

## Sheet: dacA_6xH
	pBOMBL-dacA_6xH
		Raw		Relative
		UI	I	UI	I
	IFU-1	1480000	19400	100	1.31081
	IFU-2	40100000	426000	100	1.06234
	IFU-3	2.04571e+06	7873.07	100	0.384858
	IFU-4	59700000	323000	100	0.541039
	IFU-5	9680000	77400	100	0.799587
	IFU-6	24600000	145000	100	0.589431
	Average			100	0.781345
	STDEV			0	0.349688
	P-value				9.35779e-25
		DacA_6xH		UI	I
			Average	100	0.781345
			STDEV	0	0.349688

## Sheet: dacA_6xH_qPCR
		10	14	24	dacA	average	10	14	24	P-value	10	14	24
dacA	UI-1	0.0545848	0.0554323	0.0574038		UI	0.0323221	0.0583445	0.058698		1	0.0165255	0.000290919
	UI-2	0.0194932	0.064166	0.065656		I	0.0323221	0.550061	1.2261
	UI-3	0.0228882	0.0554354	0.0530343		STDEV	10	14	24
	I-1	0.0545848	0.771418	1.03265		UI	0.0193547	0.00504149	0.00640962
	I-2	0.0194932	0.535433	1.29064		I	0.0193547	0.214418	0.170596
	I-3	0.0228882	0.343332	1.355			10	14	24	P-value	10	14	24
omcB	UI-1	0.00613415	0.00455855	0.0350109		UI	0.00342427	0.00293436	0.0401382		1	0.837624	0.000529659
	UI-2	0.0017221	0.00228652	0.0427315		I	0.00342427	0.00272362	0.0114323
	UI-3	0.00241656	0.00195802	0.0426724		STDEV	10	14	24
	I-1	0.00613415	0.00241694	0.00907142		UI	0.00237238	0.00141614	0.00444055
	I-2	0.0017221	0.00372015	0.0123351		I	0.00237238	0.000884035	0.00206334
	I-3	0.00241656	0.00203376	0.0128904			10	14	24	P-value	10	14	24
hctA	UI-1	0.00232986	0.00338948	0.146485		UI	0.00790595	0.00488071	0.186837		1	0.627739	0.00285576
	UI-2	0.0129197	0.00526948	0.21339		I	0.00790595	0.00418317	0.0369321
	UI-3	0.00846828	0.00598317	0.200636		STDEV	10	14	24
	I-1	0.00232986	0.00217409	0.0178067		UI	0.00531728	0.00133984	0.035523
	I-2	0.0129197	0.00588496	0.0394826		I	0.00531728	0.00187442	0.0179863
	I-3	0.00846828	0.00449047	0.053507			10	14	24	P-value	10	14	24
euo	UI-1	0.059001	0.0432571	0.0159224		UI	0.0487269	0.0389276	0.0181606		1	0.822559	0.00804582
	UI-2	0.0356724	0.0318217	0.0202507		I	0.0487269	0.0379252	0.0597034
	UI-3	0.0515074	0.0417042	0.0183086		STDEV	10	14	24
	I-1	0.059001	0.0339438	0.0490226		UI	0.0119102	0.00620274	0.00216797
	I-2	0.0356724	0.0414122	0.0538454		I	0.0119102	0.00375865	0.0145246
	I-3	0.0515074	0.0384195	0.0762422
gDNA		10	14	24		average	10	14	24	P-value	10	14	24
	UI-1	0.00171801	0.00560507	0.133813		UI	0.00246425	0.00550142	0.128568		1	0.283562	2.83109e-05
	UI-2	0.00233644	0.00592921	0.129324		I	0.00246425	0.00712191	0.027338
	UI-3	0.00333831	0.00496999	0.122567		STDEV	10	14	24
	I-1	0.00171801	0.00459617	0.0220388		UI	0.000817675	0.000487938	0.00566109
	I-2	0.00233644	0.00803662	0.0337502		I	0.000817675	0.00221489	0.00593447
	I-3	0.00333831	0.00873294	0.026225
ct011		10	14	24		average	10	14	24	P-value	10	14	24
	UI-1	0.0123406	0.00638018	0.00475072		UI	0.0104584	0.0135446	0.00779936		1	0.78035	0.87999
	UI-2	0.00842551	0.0150771	0.0108155		I	0.0104584	0.0151027	0.00734707
	UI-3	0.0106092	0.0191765	0.0078319		STDEV	10	14	24
	I-1	0.0123406	0.00952374	0.00295138		UI	0.00196187	0.00653435	0.00303251
	I-2	0.00842551	0.0218705	0.00970294		I	0.00196187	0.00625864	0.00381006
	I-3	0.0106092	0.0139139	0.00938689
nrdA		10	14	24		average	10	14	24	P-value	10	14	24
	UI-1	0.0275112	0.0160154	0.0236762		UI	0.0162206	0.0210851	0.023043		1	0.261522	0.0649922
	UI-2	0.00843203	0.0247959	0.029656		I	0.0162206	0.0165405	0.0116599
	UI-3	0.0127185	0.022444	0.0157968		STDEV	10	14	24
	I-1	0.0275112	0.0133374	0.00840643		UI	0.0100101	0.00454525	0.00695127
	I-2	0.00843203	0.0209632	0.0111188		I	0.0100101	0.0039565	0.00355502
	I-3	0.0127185	0.015321	0.0154544
gDNA		10	14	24		average	10	14	24	P-value	10	14	24
	UI-1	1530.45	4993.15	119204		UI	2195.23	4900.82	114532		1	0.283562	2.83109e-05
	UI-2	2081.37	5281.9	115205		I	2195.23	6344.4	24353.4
	UI-3	2973.86	4427.4	109186		STDEV	10	14	24
	I-1	1530.45	4094.39	19632.8		UI	728.408	434.669	5043.05
	I-2	2081.37	7159.25	30065.6		I	728.408	1973.09	5286.59
	I-3	2973.86	7779.55	23361.9
