# Supplementary material for: The second messenger signaling molecule cyclic di-AMP drives developmental cycle progression in Chlamydia trachomatis
Source: eLife. 2025 Sep 10;14:RP104240. doi: 10.7554/eLife.104240 (PMC12422730; doi:10.7554/eLife.104240)
Supplement: Figure 2—figure supplement 6—source data 1. [file elife-104240-fig2-figsupp6-data1.xls]

## Sheet: STING-KO HeLa
Block Type	96-Well 0.2-mL Block
Calibration Background is expired	No
Calibration Background performed on	12-02-2022
Calibration Pure Dye ABY is expired	No
Calibration Pure Dye ABY performed on	12-02-2022
Calibration Pure Dye FAM is expired	No
Calibration Pure Dye FAM performed on	12-02-2022
Calibration Pure Dye JUN is expired	No
Calibration Pure Dye JUN performed on	12-02-2022
Calibration Pure Dye NED is expired	No
Calibration Pure Dye NED performed on	12-02-2022
Calibration Pure Dye ROX is expired	No
Calibration Pure Dye ROX performed on	12-02-2022
Calibration Pure Dye SYBR is expired	No
Calibration Pure Dye SYBR performed on	12-02-2022
Calibration Pure Dye TAMRA is expired	No
Calibration Pure Dye TAMRA performed on	12-02-2022
Calibration Pure Dye VIC is expired	No
Calibration Pure Dye VIC performed on	12-02-2022
Calibration ROI is expired	No
Calibration ROI performed on	12-02-2022
Calibration Uniformity is expired	No
Calibration Uniformity performed on	12-02-2022
Chemistry	SYBR_GREEN
Date Created	2023-01-18 12:07:22 PM PST
Experiment Barcode
Experiment Comment
Experiment File Name	D:\Users\INSTR-ADMIN\Desktop\JL\Template\230118 dacA6xH_dacAKD_dacAct011.eds
Experiment Name	230118 dacA6xH_dacAKD_dacAct011
Experiment Run End Time	2023-01-18 03:59:00 AM PST
Experiment Type	Standard Curve
Instrument Name	272321701
Instrument Serial Number	272321701
Instrument Type	QuantStudio™ 3 System
Passive Reference	ROX
Post-read Stage/Step
Pre-read Stage/Step
Quantification Cycle Method	Ct
Signal Smoothing On	true
Stage where Melt Analysis is performed	Stage3
Stage/ Cycle where Ct Analysis is performed	Stage2, Step2
User Name
Well	Well Position	Omit	Sample Name	Target Name	Task	Reporter	Quencher	CT	Ct Mean	Ct SD	Quantity	Quantity Mean	Quantity SD	Y-Intercept	R(superscript 2)	Slope	Efficiency	Automatic Ct Threshold	Ct Threshold	Automatic Baseline	Baseline Start	Baseline End	Amp Status	Comments	Cq Conf	Rn (last cycle)	Delta Rn (last cycle)	Tm1	Tm2	Tm3	Tm4	MTP
1	A1	FALSE		dacA	STANDARD	SYBR	None	13.7712	13.73	0.0583326	10	10		17.244	0.9997	-3.6045	89.4222	TRUE	0.23082	TRUE	3	8	Amp		0.947321	5.81501	5.18544	79.3847				N
2	A2	FALSE		dacA	STANDARD	SYBR	None	13.6887	13.73	0.0583326	10	10		17.244	0.9997	-3.6045	89.4222	TRUE	0.23082	TRUE	3	9	Amp		0.98852	5.91506	5.3648	79.3847				N
3	A3	FALSE		dacA	STANDARD	SYBR	None	17.1906	17.1722	0.0261014	1	1		17.244	0.9997	-3.6045	89.4222	TRUE	0.23082	TRUE	3	12	Amp		0.991548	5.76736	5.28655	79.5496				N
4	A4	FALSE		dacA	STANDARD	SYBR	None	17.1537	17.1722	0.0261014	1	1		17.244	0.9997	-3.6045	89.4222	TRUE	0.23082	TRUE	3	11	Amp		0.984466	5.8734	5.35262	79.5496				N
5	A5	FALSE		dacA	STANDARD	SYBR	None	20.7127	20.7547	0.059332	0.1	0.1		17.244	0.9997	-3.6045	89.4222	TRUE	0.23082	TRUE	3	15	Amp		0.987369	5.52996	4.98845	79.3902				N
6	A6	FALSE		dacA	STANDARD	SYBR	None	20.7966	20.7547	0.059332	0.1	0.1		17.244	0.9997	-3.6045	89.4222	TRUE	0.23082	TRUE	3	15	Amp		0.989814	5.61808	5.10136	79.3902				N
7	A7	FALSE		dacA	STANDARD	SYBR	None	24.5458	24.495	0.0717764	0.01	0.01		17.244	0.9997	-3.6045	89.4222	TRUE	0.23082	TRUE	3	19	Amp		0.98807	5.31084	4.8164	79.3834				N
8	A8	FALSE		dacA	STANDARD	SYBR	None	24.4443	24.495	0.0717764	0.01	0.01		17.244	0.9997	-3.6045	89.4222	TRUE	0.23082	TRUE	3	18	Amp		0.987628	5.42964	4.94073	79.5504				N
9	A9	FALSE		dacA	STANDARD	SYBR	None	28.0431	28.0912	0.0680257	0.001	0.001		17.244	0.9997	-3.6045	89.4222	TRUE	0.23082	TRUE	3	23	Amp		0.985692	5.02841	4.50328	79.3739				N
10	A10	FALSE		dacA	STANDARD	SYBR	None	28.1393	28.0912	0.0680257	0.001	0.001		17.244	0.9997	-3.6045	89.4222	TRUE	0.23082	TRUE	3	23	Amp		0.971191	5.05613	4.46541	79.3739				N
11	A11	FALSE		dacA	NTC	SYBR	None	Undetermined						17.244	0.9997	-3.6045	89.4222	TRUE	0.23082	TRUE	3	39	No Amp		0	0.492529	-0.00345936	85.7267	90.9052			Y
12	A12	FALSE		dacA	NTC	SYBR	None	Undetermined						17.244	0.9997	-3.6045	89.4222	TRUE	0.23082	TRUE	3	39	No Amp		0	0.515698	-0.00812221	86.0608	78.8778	92.0745	72.6971	Y
13	B1	FALSE		ct011	STANDARD	SYBR	None	13.4846	13.4681	0.023377	10	10		16.992	0.9998	-3.5709	90.5643	TRUE	0.246735	TRUE	3	8	Amp		0.985715	6.19398	5.69267	78.5492				N
14	B2	FALSE		ct011	STANDARD	SYBR	None	13.4516	13.4681	0.023377	10	10		16.992	0.9998	-3.5709	90.5643	TRUE	0.246735	TRUE	3	8	Amp		0.985927	6.34352	5.82442	78.5492				N
15	B3	FALSE		ct011	STANDARD	SYBR	None	16.9222	16.9363	0.0199203	1	1		16.992	0.9998	-3.5709	90.5643	TRUE	0.246735	TRUE	3	11	Amp		0.991391	6.25988	5.80976	78.7142				N
16	B4	FALSE		ct011	STANDARD	SYBR	None	16.9503	16.9363	0.0199203	1	1		16.992	0.9998	-3.5709	90.5643	TRUE	0.246735	TRUE	3	11	Amp		0.987371	6.27019	5.82526	78.7142				N
17	B5	FALSE		ct011	STANDARD	SYBR	None	20.5253	20.5225	0.00399754	0.1	0.1		16.992	0.9998	-3.5709	90.5643	TRUE	0.246735	TRUE	3	15	Amp		0.991054	5.89738	5.47721	78.5545				N
18	B6	FALSE		ct011	STANDARD	SYBR	None	20.5196	20.5225	0.00399754	0.1	0.1		16.992	0.9998	-3.5709	90.5643	TRUE	0.246735	TRUE	3	15	Amp		0.980704	6.08683	5.63779	78.7216				N
19	B7	FALSE		ct011	STANDARD	SYBR	None	24.1799	24.1948	0.0211031	0.01	0.01		16.992	0.9998	-3.5709	90.5643	TRUE	0.246735	TRUE	3	18	Amp		0.987542	5.98869	5.56134	78.715				N
20	B8	FALSE		ct011	STANDARD	SYBR	None	24.2097	24.1948	0.0211031	0.01	0.01		16.992	0.9998	-3.5709	90.5643	TRUE	0.246735	TRUE	3	18	Amp		0.979481	5.9315	5.52238	78.715				N
21	B9	FALSE		ct011	STANDARD	SYBR	None	27.583	27.6934	0.156132	0.001	0.001		16.992	0.9998	-3.5709	90.5643	TRUE	0.246735	TRUE	3	22	Amp		0.982601	5.71634	5.29467	78.5388				N
22	B10	FALSE		ct011	STANDARD	SYBR	None	27.8038	27.6934	0.156132	0.001	0.001		16.992	0.9998	-3.5709	90.5643	TRUE	0.246735	TRUE	3	22	Amp		0.984772	5.50985	5.09948	78.5388				N
23	B11	FALSE		ct011	NTC	SYBR	None	Undetermined						16.992	0.9998	-3.5709	90.5643	TRUE	0.246735	TRUE	3	39	No Amp		0	0.303215	-0.00599763	65.8481	61.0038	77.5414		Y
24	B12	FALSE		ct011	NTC	SYBR	None	Undetermined						16.992	0.9998	-3.5709	90.5643	TRUE	0.246735	TRUE	3	39	No Amp		0	0.363609	-0.000649123	63.1754				N
25	C1	FALSE	cDNA_10hpi_dacA6xH_U	dacA	UNKNOWN	SYBR	None	31.7674	32.0696	0.264944	9.34871e-05	7.78352e-05	1.36808e-05	17.244	0.9997	-3.6045	89.4222	TRUE	0.23082	TRUE	3	26	Amp		0.945532	3.72441	2.82487	79.2176				N
26	C2	FALSE	cDNA_10hpi_dacA6xH_U	dacA	UNKNOWN	SYBR	None	32.2621	32.0696	0.264944	6.81582e-05	7.78352e-05	1.36808e-05	17.244	0.9997	-3.6045	89.4222	TRUE	0.23082	TRUE	3	26	Amp		0.95979	3.73528	2.77587	79.2176				N
27	C3	FALSE	cDNA_10hpi_dacA6xH_U	dacA	UNKNOWN	SYBR	None	32.1793	32.0696	0.264944	7.18602e-05	7.78352e-05	1.36808e-05	17.244	0.9997	-3.6045	89.4222	TRUE	0.23082	TRUE	3	27	Amp		0.959038	3.7899	2.85788	79.3825				N
28	C4	FALSE	cDNA_10hpi_dacA6xH_U	ct011	UNKNOWN	SYBR	None	32.5527	33.0661	0.448424	4.389e-05	3.24492e-05	9.95802e-06	16.992	0.9998	-3.5709	90.5643	TRUE	0.246735	TRUE	3	27	Amp		0.954129	4.10938	3.19686	78.5471				N
29	C5	FALSE	cDNA_10hpi_dacA6xH_U	ct011	UNKNOWN	SYBR	None	33.3807	33.0661	0.448424	2.57319e-05	3.24492e-05	9.95802e-06	16.992	0.9998	-3.5709	90.5643	TRUE	0.246735	TRUE	3	28	Amp		0.948888	3.79455	2.89119	78.5545				N
30	C6	FALSE	cDNA_10hpi_dacA6xH_U	ct011	UNKNOWN	SYBR	None	33.265	33.0661	0.448424	2.77258e-05	3.24492e-05	9.95802e-06	16.992	0.9998	-3.5709	90.5643	TRUE	0.246735	TRUE	3	28	Amp		0.952168	3.73418	2.8971	78.3873				N
37	D1	FALSE	cDNA_14hpi_dacA6xH_U	dacA	UNKNOWN	SYBR	None	30.379	30.2706	0.153024	0.000226963	0.000244025	2.44325e-05	17.244	0.9997	-3.6045	89.4222	TRUE	0.23082	TRUE	3	24	Amp		0.956398	4.07065	3.16751	79.2176				N
38	D2	FALSE	cDNA_14hpi_dacA6xH_U	dacA	UNKNOWN	SYBR	None	30.0955	30.2706	0.153024	0.000272014	0.000244025	2.44325e-05	17.244	0.9997	-3.6045	89.4222	TRUE	0.23082	TRUE	3	24	Amp		0.961576	4.18279	3.22084	79.2176				N
39	D3	FALSE	cDNA_14hpi_dacA6xH_U	dacA	UNKNOWN	SYBR	None	30.3372	30.2706	0.153024	0.000233099	0.000244025	2.44325e-05	17.244	0.9997	-3.6045	89.4222	TRUE	0.23082	TRUE	3	25	Amp		0.96432	4.15975	3.20843	79.3825				N
40	D4	FALSE	cDNA_14hpi_dacA6xH_I	dacA	UNKNOWN	SYBR	None	26.0272	26.0198	0.0110759	0.00365817	0.00367551	2.60567e-05	17.244	0.9997	-3.6045	89.4222	TRUE	0.23082	TRUE	3	21	Amp		0.963371	4.71595	3.72115	79.3825				N
41	D5	FALSE	cDNA_14hpi_dacA6xH_I	dacA	UNKNOWN	SYBR	None	26.0071	26.0198	0.0110759	0.00370548	0.00367551	2.60567e-05	17.244	0.9997	-3.6045	89.4222	TRUE	0.23082	TRUE	3	21	Amp		0.964273	4.7119	3.71663	79.3902				N
42	D6	FALSE	cDNA_14hpi_dacA6xH_I	dacA	UNKNOWN	SYBR	None	26.0252	26.0198	0.0110759	0.0036629	0.00367551	2.60567e-05	17.244	0.9997	-3.6045	89.4222	TRUE	0.23082	TRUE	3	21	Amp		0.959628	4.71972	3.71263	79.3902				N
43	D7	FALSE	cDNA_24hpi_dacA6xH_U	dacA	UNKNOWN	SYBR	None	26.2447	26.2802	0.0648366	0.00318369	0.00311395	0.000127402	17.244	0.9997	-3.6045	89.4222	TRUE	0.23082	TRUE	3	21	Amp		0.960262	4.72566	3.7434	79.3834				N
44	D8	FALSE	cDNA_24hpi_dacA6xH_U	dacA	UNKNOWN	SYBR	None	26.3551	26.2802	0.0648366	0.00296691	0.00311395	0.000127402	17.244	0.9997	-3.6045	89.4222	TRUE	0.23082	TRUE	3	22	Amp		0.96501	4.6226	3.64827	79.3834				N
45	D9	FALSE	cDNA_24hpi_dacA6xH_U	dacA	UNKNOWN	SYBR	None	26.241	26.2802	0.0648366	0.00319126	0.00311395	0.000127402	17.244	0.9997	-3.6045	89.4222	TRUE	0.23082	TRUE	3	21	Amp		0.967185	4.68714	3.7249	79.3739				N
46	D10	FALSE	cDNA_24hpi_dacA6xH_I	dacA	UNKNOWN	SYBR	None	22.8036	22.7732	0.0421204	0.0286804	0.0292501	0.000792426	17.244	0.9997	-3.6045	89.4222	TRUE	0.23082	TRUE	3	18	Amp		0.974535	4.92709	3.97458	79.3739				N
47	D11	FALSE	cDNA_24hpi_dacA6xH_I	dacA	UNKNOWN	SYBR	None	22.7909	22.7732	0.0421204	0.0289148	0.0292501	0.000792426	17.244	0.9997	-3.6045	89.4222	TRUE	0.23082	TRUE	3	18	Amp		0.97382	4.98417	3.95669	79.2119				N
48	D12	FALSE	cDNA_24hpi_dacA6xH_I	dacA	UNKNOWN	SYBR	None	22.7251	22.7732	0.0421204	0.030155	0.0292501	0.000792426	17.244	0.9997	-3.6045	89.4222	TRUE	0.23082	TRUE	3	17	Amp		0.967985	4.80069	3.89657	79.2119				N
49	E1	FALSE	cDNA_14hpi_dacA6xH_U	ct011	UNKNOWN	SYBR	None	32.099	32.1298	0.238763	5.88063e-05	5.81009e-05	8.78805e-06	16.992	0.9998	-3.5709	90.5643	TRUE	0.246735	TRUE	3	27	Amp		0.94771	4.0223	3.195	78.3821				N
50	E2	FALSE	cDNA_14hpi_dacA6xH_U	ct011	UNKNOWN	SYBR	None	31.9079	32.1298	0.238763	6.65149e-05	5.81009e-05	8.78805e-06	16.992	0.9998	-3.5709	90.5643	TRUE	0.246735	TRUE	3	26	Amp		0.958156	4.2113	3.32066	78.3821				N
51	E3	FALSE	cDNA_14hpi_dacA6xH_U	ct011	UNKNOWN	SYBR	None	32.3825	32.1298	0.238763	4.89814e-05	5.81009e-05	8.78805e-06	16.992	0.9998	-3.5709	90.5643	TRUE	0.246735	TRUE	3	27	Amp		0.955508	4.07883	3.18769	78.5471				N
52	E4	FALSE	cDNA_14hpi_dacA6xH_I	ct011	UNKNOWN	SYBR	None	31.6885	31.8442	0.137013	7.66274e-05	6.94882e-05	6.26646e-06	16.992	0.9998	-3.5709	90.5643	TRUE	0.246735	TRUE	3	26	Amp		0.956117	4.28681	3.36555	78.5471				N
53	E5	FALSE	cDNA_14hpi_dacA6xH_I	ct011	UNKNOWN	SYBR	None	31.8981	31.8442	0.137013	6.69401e-05	6.94882e-05	6.26646e-06	16.992	0.9998	-3.5709	90.5643	TRUE	0.246735	TRUE	3	27	Amp		0.957694	4.24373	3.36665	78.5545				N
54	E6	FALSE	cDNA_14hpi_dacA6xH_I	ct011	UNKNOWN	SYBR	None	31.9461	31.8442	0.137013	6.48972e-05	6.94882e-05	6.26646e-06	16.992	0.9998	-3.5709	90.5643	TRUE	0.246735	TRUE	3	27	Amp		0.957657	4.21953	3.32548	78.5545				N
55	E7	FALSE	cDNA_24hpi_dacA6xH_U	ct011	UNKNOWN	SYBR	None	28.9771	29.0591	0.104679	0.000440221	0.000418188	2.77758e-05	16.992	0.9998	-3.5709	90.5643	TRUE	0.246735	TRUE	3	23	Amp		0.953843	4.7792	3.88862	78.5479				N
56	E8	FALSE	cDNA_24hpi_dacA6xH_U	ct011	UNKNOWN	SYBR	None	29.0231	29.0591	0.104679	0.000427355	0.000418188	2.77758e-05	16.992	0.9998	-3.5709	90.5643	TRUE	0.246735	TRUE	3	23	Amp		0.961908	4.72557	3.86012	78.5479				N
57	E9	FALSE	cDNA_24hpi_dacA6xH_U	ct011	UNKNOWN	SYBR	None	29.177	29.0591	0.104679	0.000386987	0.000418188	2.77758e-05	16.992	0.9998	-3.5709	90.5643	TRUE	0.246735	TRUE	3	24	Amp		0.9674	4.71669	3.85009	78.5388				N
58	E10	FALSE	cDNA_24hpi_dacA6xH_I	ct011	UNKNOWN	SYBR	None	30.6944	30.9175	0.239762	0.000145463	0.00012697	1.92881e-05	16.992	0.9998	-3.5709	90.5643	TRUE	0.246735	TRUE	3	25	Amp		0.970036	4.32008	3.8144	78.5388				N
59	E11	FALSE	cDNA_24hpi_dacA6xH_I	ct011	UNKNOWN	SYBR	None	31.171	30.9175	0.239762	0.000106974	0.00012697	1.92881e-05	16.992	0.9998	-3.5709	90.5643	TRUE	0.246735	TRUE	3	26	Amp		0.969935	4.25806	3.39785	78.3767				N
60	E12	FALSE	cDNA_24hpi_dacA6xH_I	ct011	UNKNOWN	SYBR	None	30.887	30.9175	0.239762	0.000128473	0.00012697	1.92881e-05	16.992	0.9998	-3.5709	90.5643	TRUE	0.246735	TRUE	3	26	Amp		0.965449	4.17254	3.51584	78.3767				N
61	F1	FALSE	cDNA_10hpi_dacAKD_U	dacA	UNKNOWN	SYBR	None	32.2581	32.4715	0.21432	6.83329e-05	5.9995e-05	8.18811e-06	17.244	0.9997	-3.6045	89.4222	TRUE	0.23082	TRUE	3	26	Amp		0.932458	3.60135	2.63841	79.0505				N
62	F2	FALSE	cDNA_10hpi_dacAKD_U	dacA	UNKNOWN	SYBR	None	32.6867	32.4715	0.21432	5.19654e-05	5.9995e-05	8.18811e-06	17.244	0.9997	-3.6045	89.4222	TRUE	0.23082	TRUE	3	28	Amp		0.92639	3.61466	2.5257	79.0505				N
63	F3	FALSE	cDNA_10hpi_dacAKD_U	dacA	UNKNOWN	SYBR	None	32.4699	32.4715	0.21432	5.96866e-05	5.9995e-05	8.18811e-06	17.244	0.9997	-3.6045	89.4222	TRUE	0.23082	TRUE	3	27	Amp		0.950363	3.65331	2.68616	79.2155				N
64	F4	FALSE	cDNA_10hpi_dacAKD_U	ct011	UNKNOWN	SYBR	None	34.0872	33.8596	0.200429	1.63164e-05	1.89997e-05	2.37121e-06	16.992	0.9998	-3.5709	90.5643	TRUE	0.246735	TRUE	3	28	Amp		0.949236	3.45933	2.57516	78.5471				N
65	F5	FALSE	cDNA_10hpi_dacAKD_U	ct011	UNKNOWN	SYBR	None	33.7817	33.8596	0.200429	1.98693e-05	1.89997e-05	2.37121e-06	16.992	0.9998	-3.5709	90.5643	TRUE	0.246735	TRUE	3	29	Amp		0.954229	3.63033	2.78379	78.3873				N
66	F6	FALSE	cDNA_10hpi_dacAKD_U	ct011	UNKNOWN	SYBR	None	33.7097	33.8596	0.200429	2.08133e-05	1.89997e-05	2.37121e-06	16.992	0.9998	-3.5709	90.5643	TRUE	0.246735	TRUE	3	28	Amp		0.954464	3.55532	2.69785	78.3873				N
73	G1	FALSE	cDNA_14hpi_dacAKD_U	dacA	UNKNOWN	SYBR	None	30.9903	31.0038	0.135228	0.000153587	0.000152639	1.30887e-05	17.244	0.9997	-3.6045	89.4222	TRUE	0.23082	TRUE	3	25	Amp		0.968432	3.79454	2.97173	79.0505				N
74	G2	FALSE	cDNA_14hpi_dacAKD_U	dacA	UNKNOWN	SYBR	None	31.1453	31.0038	0.135228	0.000139103	0.000152639	1.30887e-05	17.244	0.9997	-3.6045	89.4222	TRUE	0.23082	TRUE	3	26	Amp		0.957653	3.84861	2.97934	79.0505				N
75	G3	FALSE	cDNA_14hpi_dacAKD_U	dacA	UNKNOWN	SYBR	None	30.8759	31.0038	0.135228	0.000165228	0.000152639	1.30887e-05	17.244	0.9997	-3.6045	89.4222	TRUE	0.23082	TRUE	3	25	Amp		0.966315	3.95421	3.03934	79.3825				N
76	G4	FALSE	cDNA_14hpi_dacAKD_I	dacA	UNKNOWN	SYBR	None	34.9082	35.3836	0.412707	1.2572e-05	9.5061e-06	2.65906e-06	17.244	0.9997	-3.6045	89.4222	TRUE	0.23082	TRUE	3	29	Amp		0.945848	2.80107	1.88304	79.3825				N
77	G5	FALSE	cDNA_14hpi_dacAKD_I	dacA	UNKNOWN	SYBR	None	35.6498	35.3836	0.412707	7.82818e-06	9.5061e-06	2.65906e-06	17.244	0.9997	-3.6045	89.4222	TRUE	0.23082	TRUE	3	30	Amp		0.944673	2.48939	1.6098	79.2231				N
78	G6	FALSE	cDNA_14hpi_dacAKD_I	dacA	UNKNOWN	SYBR	None	35.5929	35.3836	0.412707	8.11815e-06	9.5061e-06	2.65906e-06	17.244	0.9997	-3.6045	89.4222	TRUE	0.23082	TRUE	3	29	Amp		0.937566	2.48243	1.6108	79.2231				N
79	G7	FALSE	cDNA_24hpi_dacAKD_U	dacA	UNKNOWN	SYBR	None	27.2182	27.1421	0.0694597	0.00170941	0.00179577	7.90743e-05	17.244	0.9997	-3.6045	89.4222	TRUE	0.23082	TRUE	3	21	Amp		0.965394	4.54606	3.65075	79.2163				N
80	G8	FALSE	cDNA_24hpi_dacAKD_U	dacA	UNKNOWN	SYBR	None	27.0822	27.1421	0.0694597	0.00186462	0.00179577	7.90743e-05	17.244	0.9997	-3.6045	89.4222	TRUE	0.23082	TRUE	3	22	Amp		0.9692	4.55584	3.68932	79.2163				N
81	G9	FALSE	cDNA_24hpi_dacAKD_U	dacA	UNKNOWN	SYBR	None	27.1259	27.1421	0.0694597	0.00181329	0.00179577	7.90743e-05	17.244	0.9997	-3.6045	89.4222	TRUE	0.23082	TRUE	3	21	Amp		0.967476	4.52172	3.63802	79.2069				N
82	G10	FALSE	cDNA_24hpi_dacAKD_I	dacA	UNKNOWN	SYBR	None	30.3976	30.5198	0.106161	0.000224276	0.00020775	1.43467e-05	17.244	0.9997	-3.6045	89.4222	TRUE	0.23082	TRUE	3	25	Amp		0.973601	3.95582	3.09682	79.2069				N
83	G11	FALSE	cDNA_24hpi_dacAKD_I	dacA	UNKNOWN	SYBR	None	30.5731	30.5198	0.106161	0.000200496	0.00020775	1.43467e-05	17.244	0.9997	-3.6045	89.4222	TRUE	0.23082	TRUE	3	25	Amp		0.979107	3.86518	3.02325	79.0448				N
84	G12	FALSE	cDNA_24hpi_dacAKD_I	dacA	UNKNOWN	SYBR	None	30.5889	30.5198	0.106161	0.000198479	0.00020775	1.43467e-05	17.244	0.9997	-3.6045	89.4222	TRUE	0.23082	TRUE	3	26	Amp		0.963794	3.78296	2.97531	79.0448				N
85	H1	FALSE	cDNA_14hpi_dacAKD_U	ct011	UNKNOWN	SYBR	None	32.8371	32.4046	0.380485	3.65348e-05	4.92213e-05	1.1244e-05	16.992	0.9998	-3.5709	90.5643	TRUE	0.246735	TRUE	3	27	Amp		0.943361	3.6932	2.89395	78.215				N
86	H2	FALSE	cDNA_14hpi_dacAKD_U	ct011	UNKNOWN	SYBR	None	32.1216	32.4046	0.380485	5.79554e-05	4.92213e-05	1.1244e-05	16.992	0.9998	-3.5709	90.5643	TRUE	0.246735	TRUE	3	27	Amp		0.966885	3.96518	3.13456	78.3821				N
87	H3	FALSE	cDNA_14hpi_dacAKD_U	ct011	UNKNOWN	SYBR	None	32.2551	32.4046	0.380485	5.31736e-05	4.92213e-05	1.1244e-05	16.992	0.9998	-3.5709	90.5643	TRUE	0.246735	TRUE	3	27	Amp		0.962073	3.95359	3.15506	78.5471				N
88	H4	FALSE	cDNA_14hpi_dacAKD_I	ct011	UNKNOWN	SYBR	None	34.2378	34.5792	0.299334	1.48065e-05	1.20339e-05	2.4226e-06	16.992	0.9998	-3.5709	90.5643	TRUE	0.246735	TRUE	3	29	Amp		0.901455	3.35847	2.51143	78.5471				N
89	H5	FALSE	cDNA_14hpi_dacAKD_I	ct011	UNKNOWN	SYBR	None	34.7968	34.5792	0.299334	1.03258e-05	1.20339e-05	2.4226e-06	16.992	0.9998	-3.5709	90.5643	TRUE	0.246735	TRUE	3	30	Amp		0.949365	3.04476	2.24863	78.3873				N
90	H6	FALSE	cDNA_14hpi_dacAKD_I	ct011	UNKNOWN	SYBR	None	34.703	34.5792	0.299334	1.09693e-05	1.20339e-05	2.4226e-06	16.992	0.9998	-3.5709	90.5643	TRUE	0.246735	TRUE	3	29	Amp		0.947399	3.12342	2.31913	78.3873				N
91	H7	FALSE	cDNA_24hpi_dacAKD_U	ct011	UNKNOWN	SYBR	None	28.6822	28.576	0.148034	0.000532443	0.000571916	5.58701e-05	16.992	0.9998	-3.5709	90.5643	TRUE	0.246735	TRUE	3	23	Amp		0.962136	4.7851	3.94568	78.3808				N
92	H8	FALSE	cDNA_24hpi_dacAKD_U	ct011	UNKNOWN	SYBR	None	28.4069	28.576	0.148034	0.000635844	0.000571916	5.58701e-05	16.992	0.9998	-3.5709	90.5643	TRUE	0.246735	TRUE	3	23	Amp		0.964208	4.82464	3.99919	78.3808				N
93	H9	FALSE	cDNA_24hpi_dacAKD_U	ct011	UNKNOWN	SYBR	None	28.639	28.576	0.148034	0.000547461	0.000571916	5.58701e-05	16.992	0.9998	-3.5709	90.5643	TRUE	0.246735	TRUE	3	23	Amp		0.966788	4.70477	3.85756	78.5388				N
94	H10	FALSE	cDNA_24hpi_dacAKD_I	ct011	UNKNOWN	SYBR	None	30.4306	30.4386	0.128691	0.000172441	0.000171949	1.42018e-05	16.992	0.9998	-3.5709	90.5643	TRUE	0.246735	TRUE	3	24	Amp		0.970822	4.31338	3.50088	78.5388				N
95	H11	FALSE	cDNA_24hpi_dacAKD_I	ct011	UNKNOWN	SYBR	None	30.314	30.4386	0.128691	0.000185899	0.000171949	1.42018e-05	16.992	0.9998	-3.5709	90.5643	TRUE	0.246735	TRUE	3	25	Amp		0.97023	4.30236	3.51136	78.3767				N
96	H12	FALSE	cDNA_24hpi_dacAKD_I	ct011	UNKNOWN	SYBR	None	30.5711	30.4386	0.128691	0.000157508	0.000171949	1.42018e-05	16.992	0.9998	-3.5709	90.5643	TRUE	0.246735	TRUE	3	26	Amp		0.90618	4.3079	3.39566	78.3767				N
gDNA	93.614		OE	dacA-SKH-1	89.422
	dacA6xH	dacAKD		raw	10	14	24	efficiency	10	14	24	cDNA/gDNA	10	14	24	average	10	14	24		10	14	24
10-UI	0.00108663	0.000428444		dacA6xH-UI	9.34871e-05	0.000226963	0.00318369	dacA6xH-UI	8.3598e-05	0.000202955	0.00284692	dacA6xH-UI	0.076933	0.148115	0.107015	dacA6xH-UI	0.0640526	0.15925	0.104671	dacA6xH-UI	0.0640526	0.15925	0.104671
14-UI	0.00137025	0.00180297			6.81582e-05	0.000272014	0.00296691		6.09484e-05	0.000243241	0.00265307		0.0560891	0.177516	0.0997283					dacA6xH-I	0.0640526	1.61264	4.19858
14-I	0.0020381	0.000675317			7.18602e-05	0.000233099	0.00319126		6.42588e-05	0.000208441	0.00285368		0.0591357	0.152119	0.10727
24-UI	0.0266029	0.0502279		dacA6xH-I	9.34871e-05	0.00365817	0.0286804	dacA6xH-I	8.3598e-05	0.00327121	0.0256466	dacA6xH-I	0.076933	1.60503	4.11681	dacA6xH-I	0.0640526	1.61264	4.19858
24-I	0.00622973	0.0369689			6.81582e-05	0.00370548	0.0289148		6.09484e-05	0.00331351	0.0258562		0.0560891	1.62579	4.15046
	0.00116076	0.000457671			7.18602e-05	0.0036629	0.030155		6.42588e-05	0.00327544	0.0269652		0.0591357	1.60711	4.32848
	0.00146372	0.00192596
	0.00217713	0.000721385		omcB-SKH-1	91.64
	0.0284177	0.0536543		raw	10	14	24	efficiency	10	14	24	cDNA/gDNA	10	14	24	average	10	14	24		10	14	24
	0.0066547	0.0394907		dacA6xH-UI	8.82056e-06	9.44398e-06	0.00525127	dacA6xH-UI	8.08316e-06	8.65446e-06	0.00481226	dacA6xH-UI	0.00743871	0.00631598	0.180892	dacA6xH-UI	0.00568078	0.0065681	0.182778	dacA6xH-UI	0.00568078	0.0065681	0.182778
					4.43771e-06	7.58148e-06	0.00536975		4.06672e-06	6.94767e-06	0.00492084		0.00374249	0.00507037	0.184974					dacA6xH-I	0.00568078	0.00719464	0.0630376
					6.94992e-06	1.24375e-05	0.00529701		6.36891e-06	1.13977e-05	0.00485418		0.00586113	0.00831797	0.182468
				dacA6xH-I	8.82056e-06	1.99756e-05	0.000439489	dacA6xH-I	8.08316e-06	1.83056e-05	0.000402748	dacA6xH-I	0.00743871	0.00898172	0.0646493	dacA6xH-I	0.00568078	0.00719464	0.0630376
					4.43771e-06	1.66232e-05	0.000480068		4.06672e-06	1.52335e-05	0.000439935		0.00374249	0.0074744	0.0706186
					6.94992e-06	1.14044e-05	0.000366041		6.36891e-06	1.04509e-05	0.00033544		0.00586113	0.0051278	0.053845
				hctA-SKH-1	91.457
				raw	10	14	24	efficiency	10	14	24	cDNA/gDNA	10	14	24	average	10	14	24		10	14	24
				dacA6xH-UI	6.79416e-05	4.08251e-05	0.0208547	dacA6xH-UI	6.21373e-05	3.73374e-05	0.0190731	dacA6xH-UI	0.0571833	0.0272486	0.716953	dacA6xH-UI	0.0545086	0.0280961	0.732659	dacA6xH-UI	0.0545086	0.0280961	0.732659
					6.47637e-05	3.93854e-05	0.0215751		5.9231e-05	3.60207e-05	0.0197319		0.0545086	0.0262877	0.74172					dacA6xH-I	0.0545086	0.0306968	0.204515
					6.15856e-05	4.6074e-05	0.0215048		5.63243e-05	4.21379e-05	0.0196676		0.0518337	0.030752	0.739303
				dacA6xH-I	6.79416e-05	6.58681e-05	0.00162188	dacA6xH-I	6.21373e-05	6.0241e-05	0.00148332	dacA6xH-I	0.0571833	0.0295575	0.238104	dacA6xH-I	0.0545086	0.0306968	0.204515
					6.47637e-05	7.77666e-05	0.00128185		5.9231e-05	7.1123e-05	0.00117234		0.0545086	0.0348968	0.188185
					6.15856e-05	6.15864e-05	0.00127553		5.63243e-05	5.6325e-05	0.00116656		0.0518337	0.0276361	0.187257
				ct011-SKH-1	90.564
				raw	10	14	24	efficiency	10	14	24	cDNA/gDNA	10	14	24	average	10	14	24		10	14	24
				dacA6xH-UI	4.389e-05	5.88063e-05	0.000440221	dacA6xH-UI	3.97485e-05	5.32573e-05	0.000398681	dacA6xH-UI	0.0365795	0.0388669	0.0149864	dacA6xH-UI	0.0270443	0.0384007	0.0142363	dacA6xH-UI	0.0270443	0.0384007	0.0142363
					2.57319e-05	6.65149e-05	0.000427355		2.33039e-05	6.02386e-05	0.00038703		0.0214459	0.0439618	0.0145484					dacA6xH-I	0.0270443	0.0308775	0.0184581
					2.77258e-05	4.89814e-05	0.000386987		2.51096e-05	4.43595e-05	0.000350471		0.0231076	0.0323733	0.0131741
				dacA6xH-I	4.389e-05	7.66274e-05	0.000145463	dacA6xH-I	3.97485e-05	6.93968e-05	0.000131737	dacA6xH-I	0.0365795	0.0340498	0.0211465	dacA6xH-I	0.0270443	0.0308775	0.0184581
					2.57319e-05	6.69401e-05	0.000106974		2.33039e-05	6.06237e-05	9.68804e-05		0.0214459	0.0297452	0.0155513
					2.77258e-05	6.48972e-05	0.000128473		2.51096e-05	5.87735e-05	0.00011635		0.0231076	0.0288375	0.0186766
				euo-SKH-1	93.614
				raw	10	14	24	efficiency	10	14	24	cDNA/gDNA	10	14	24	average	10	14	24		10	14	24
				dacA6xH-UI	7.30675e-05	9.08475e-05	0.000547437	dacA6xH-UI	6.84014e-05	8.5046e-05	0.000512478	dacA6xH-UI	0.0629479	0.0620661	0.019264	dacA6xH-UI	0.0573286	0.064203	0.019315	dacA6xH-UI	0.0573286	0.064203	0.019315
					4.88136e-05	9.58777e-05	0.000547281		4.56964e-05	8.9755e-05	0.000512331		0.0420531	0.0655027	0.0192585					dacA6xH-I	0.0573286	0.0492164	0.0610104
					7.77533e-05	9.52007e-05	0.000551947		7.27879e-05	8.91212e-05	0.000516699		0.0669848	0.0650401	0.0194226
				dacA6xH-I	7.30675e-05	0.000108014	0.000370113	dacA6xH-I	6.84014e-05	0.000101116	0.000346477	dacA6xH-I	0.0629479	0.0496131	0.0556168	dacA6xH-I	0.0573286	0.0492164	0.0610104
					4.88136e-05	0.000105247	0.000363105		4.56964e-05	9.85259e-05	0.000339917		0.0420531	0.0483422	0.0545638
					7.77533e-05	0.00010819	0.000484799		7.27879e-05	0.000101281	0.00045384		0.0669848	0.049694	0.0728506
			KD
				dacA-SKH-1	89.422
				raw	10	14	24	efficiency	10	14	24	cDNA/gDNA	10	14	24	average	10	14	24		10	14	24
				dacAKD-UI	6.83329e-05	0.000153587	0.00170941	dacAKD-UI	6.11047e-05	0.000137341	0.00152858	dacAKD-UI	0.14262	0.0761749	0.030433	dacAKD-UI	0.125218	0.0757048	0.0319705	dacAKD-UI	0.125218	0.0757048	0.0319705
					5.19654e-05	0.000139103	0.00186462		4.64685e-05	0.000124388	0.00166738		0.108459	0.0689909	0.0331962					dacAKD-I	0.125218	0.0125875	0.00502516
					5.96866e-05	0.000165228	0.00181329		5.33729e-05	0.000147751	0.00162148		0.124574	0.0819486	0.0322824
				dacAKD-I	6.83329e-05	1.2572e-05	0.000224276	dacAKD-I	6.11047e-05	1.12421e-05	0.000200552	dacAKD-I	0.14262	0.0166471	0.00542488	dacAKD-I	0.125218	0.0125875	0.00502516
					5.19654e-05	7.82818e-06	0.000200496		4.64685e-05	7.00012e-06	0.000179288		0.108459	0.0103657	0.0048497
					5.96866e-05	8.11815e-06	0.000198479		5.33729e-05	7.25942e-06	0.000177484		0.124574	0.0107496	0.00480091
				omcB-SKH-1	91.64
				raw	10	14	24	efficiency	10	14	24	cDNA/gDNA	10	14	24	average	10	14	24		10	14	24
				dacAKD-UI	3.97069e-06	1.96985e-05	0.00829936	dacAKD-UI	3.63874e-06	1.80517e-05	0.00760553	dacAKD-UI	0.00849293	0.0100122	0.15142	dacAKD-UI	0.00801952	0.00793127	0.149921	dacAKD-UI	0.00801952	0.00793127	0.149921
					2.50208e-06	1.32005e-05	0.00812455		2.2929e-06	1.20969e-05	0.00744534		0.0053517	0.00670947	0.148231					dacAKD-I	0.00801952	0.0237935	0.0449079
					4.77531e-06	1.3914e-05	0.00822762		4.3761e-06	1.27508e-05	0.00753979		0.0102139	0.00707213	0.150112
				dacAKD-I	3.97069e-06	1.17442e-05	0.00181224	dacAKD-I	3.63874e-06	1.07624e-05	0.00166074	dacAKD-I	0.00849293	0.0159368	0.0449226	dacAKD-I	0.00801952	0.0237935	0.0449079
					2.50208e-06	1.7267e-05	0.00197002		2.2929e-06	1.58235e-05	0.00180532		0.0053517	0.0234312	0.0488336
					4.77531e-06	2.35909e-05	0.00165269		4.3761e-06	2.16187e-05	0.00151452		0.0102139	0.0320127	0.0409675
				hctA-SKH-1	91.457
				raw	10	14	24	efficiency	10	14	24	cDNA/gDNA	10	14	24	average	10	14	24		10	14	24
				dacAKD-UI	2.98785e-06	1.48719e-05	0.0407927	dacAKD-UI	2.7326e-06	1.36014e-05	0.0373078	dacAKD-UI	0.00637795	0.0075439	0.74277	dacAKD-UI	0.0107942	0.00761539	0.750074	dacAKD-UI	0.0107942	0.00761539	0.750074
					7.74417e-06	1.94202e-05	0.0434177		7.08259e-06	1.77611e-05	0.0397085		0.016531	0.00985104	0.790567					dacAKD-I	0.0107942	0.0147093	0.332546
					4.43802e-06	1.07465e-05	0.0393711		4.05888e-06	9.82839e-06	0.0360077		0.00947355	0.00545123	0.716886
				dacAKD-I	2.98785e-06	1.69372e-05	0.0140944	dacAKD-I	2.7326e-06	1.54903e-05	0.0128903	dacAKD-I	0.00637795	0.0229378	0.348679	dacAKD-I	0.0107942	0.0147093	0.332546
					7.74417e-06	9.68116e-06	0.0138105		7.08259e-06	8.8541e-06	0.0126307		0.016531	0.013111	0.341656
					4.43802e-06	5.96556e-06	0.0124218		4.05888e-06	5.45592e-06	0.0113606		0.00947355	0.00807905	0.307301
				ct011-SKH-1	90.564
				raw	10	14	24	efficiency	10	14	24	cDNA/gDNA	10	14	24	average	10	14	24		10	14	24
				dacAKD-UI	1.63164e-05	3.65348e-05	0.000532443	dacAKD-UI	1.47768e-05	3.30874e-05	0.000482202	dacAKD-UI	0.0344895	0.0183516	0.00960027	dacAKD-UI	0.0401613	0.0247241	0.010312	dacAKD-UI	0.0401613	0.0247241	0.010312
					1.98693e-05	5.79554e-05	0.000635844		1.79944e-05	5.24868e-05	0.000575846		0.0419994	0.0291113	0.0114647					dacAKD-I	0.0401613	0.0161381	0.0042123
					2.08133e-05	5.31736e-05	0.000547461		1.88494e-05	4.81561e-05	0.000495803		0.0439949	0.0267094	0.00987107
				dacAKD-I	1.63164e-05	1.48065e-05	0.000172441	dacAKD-I	1.47768e-05	1.34093e-05	0.000156169	dacAKD-I	0.0344895	0.0198563	0.00422434	dacAKD-I	0.0401613	0.0161381	0.0042123
					1.98693e-05	1.03258e-05	0.000185899		1.79944e-05	9.35148e-06	0.000168357		0.0419994	0.0138475	0.00455403
					2.08133e-05	1.09693e-05	0.000157508		1.88494e-05	9.93426e-06	0.000142646		0.0439949	0.0147105	0.00385853
				euo-SKH-1	93.614
				raw	10	14	24	efficiency	10	14	24	cDNA/gDNA	10	14	24	average	10	14	24		10	14	24
				dacAKD-UI	6.89887e-05	0.000102583	0.0013431	dacAKD-UI	6.45831e-05	9.60316e-05	0.00125733	dacAKD-UI	0.150739	0.0532631	0.0250325	dacAKD-UI	0.14152	0.0556285	0.0258529	dacAKD-UI	0.14152	0.0556285	0.0258529
					6.12528e-05	0.000108078	0.00143751		5.73412e-05	0.000101176	0.00134571		0.133836	0.0561165	0.0267922					dacAKD-I	0.14152	0.223558	0.0335709
					6.40666e-05	0.000110754	0.00138074		5.99753e-05	0.000103681	0.00129256		0.139984	0.0575059	0.0257339
				dacAKD-I	6.89887e-05	0.000173929	0.00135326	dacAKD-I	6.45831e-05	0.000162822	0.00126684	dacAKD-I	0.150739	0.241105	0.0342678	dacAKD-I	0.14152	0.223558	0.0335709
					6.12528e-05	0.000147877	0.00133262		5.73412e-05	0.000138433	0.00124752		0.133836	0.20499	0.0337452
					6.40666e-05	0.000162009	0.00129134		5.99753e-05	0.000151663	0.00120888		0.139984	0.22458	0.0326998
