# Supplementary material for: The second messenger signaling molecule cyclic di-AMP drives developmental cycle progression in Chlamydia trachomatis
Source: eLife. 2025 Sep 10;14:RP104240. doi: 10.7554/eLife.104240 (PMC12422730; doi:10.7554/eLife.104240)
Supplement: Figure 2—source data 1. [file elife-104240-fig2-data1.xlsx]

## Sheet: DacA_IFU
pBL-dacA (No tag)
	24 hpi (UI)	24 hpi (UI)	24 hpi (I)	24 hpi (I)	24 hpi (UI)	24 hpi (UI)	24 hpi (I)	24 hpi (I)	24 hpi (UI)	24 hpi (UI)	24 hpi (I)	24 hpi (I)			UI	I	UI	I
#1	11	17	2	8	5	7	9	3	3	6	6	4		1	1.17451e+07	3581.6	100	0.0304945
#2	16	11	3	6	7	7	7	8	2	5	4	2		2	11519200	5582.13	100	0.0484594
#3	12	13	1	7	12	11	6	3	4	5	2	5		3	8.64747e+06	7195.47	100	0.083209
#4	11	14	3	2	15	15	8	9	5	7	4	5		average	1.06372e+07	5453.07	100	0.0540543
#5	7	13	3	6	20	17	8	5	5	3	3	11		stdev	1.72689e+06	1810.39	1.00486e-14	0.0267989
#6	10	6	4	6	15	9	10	8	6	7	8	6		p-value	0.000438031		3.446e-15
#7	11	11	2	1	17	10	6	9	10	10	6	8		Relative	100	0.0512639
#8	16	18	1	5	10	12	6	6	10	10	7	6
#9	10	9	2	2	14	9	4	4	3	6	7	5
#10	15	11	2	4	15	9	8	4	9	15	11	12
#11	14	10	1	6	14	21	5	6	10	13	10	15
#12	9	9	4	3	10	10	5	4	18	8	9	16
#13	18	18	4	8	6	12	5	5	14	17	3	12
#14	8	16	8	3	13	10	5	1	11	16	7	12
#15	11	9	1	3	12	13	2	4	13	17	5	12
Dilution	10^-3	10^-3	10^0	10^0	10^-3	10^-3	10^0	10^0	10^-3	10^-3	10^0	10^0
average (inclusions/FOV)	11.9333	12.3333	2.73333	4.66667	12.3333	11.4667	6.26667	5.26667	8.2	9.66667	6.13333	8.73333
IFU (/ml/well)	1.17451e+07		3581.6		11519200		5582.13		8.64747e+06		7195.47

## Sheet: DacAD164N_IFU
pBL-dacAD164N (No tag)
	24 hpi (UI)	24 hpi (UI)	24 hpi (I)	24 hpi (I)	24 hpi (UI)	24 hpi (UI)	24 hpi (I)	24 hpi (I)	24 hpi (UI)	24 hpi (UI)	24 hpi (I)	24 hpi (I)			UI	I	UI	I
#1	8	15	2	0	11	6	0	0	10	22	0	0		1	12584000	484	100	0.00384615
#2	11	12	1	1	13	6	0	0	13	10	1	0		2	1.19387e+07	129.067	100	0.00108108
#3	13	13	1	1	14	18	1	1	9	16	0	0		3	1.04544e+07	419.467	100	0.00401235
#4	16	11	0	1	19	11	0	0	9	8	0	0		average	1.1659e+07	344.178	100	0.00297986
#5	17	15	1	0	18	21	0	1	11	8	0	3		stdev	1.09199e+06	189.065	0	0.00164649
#6	14	14	0	1	13	13	0	0	12	7	0	0		p-value	5.03237e-05		4.9e-20
#7	14	21	1	0	12	10	0	0	18	6	0	1		Relative	100	0.00295203
#8	16	11	0	0	11	12	1	0	6	12	0	1
#9	14	14	0	0	13	8	0	0	12	10	2	1
#10	8	15	0	0	15	9	0	0	17	11	1	0
#11	9	16	1	0	11	8	0	0	9	14	0	1
#12	11	17	0	0	13	12	0	0	10	9	1	0
#13	13	12	1	0	11	14	0	0	6	12	0	1
#14	13	9	2	0	9	13	0	0	8	9	0	0
#15	6	12	1	0	16	10	0	0	10	10	0	0
Dilution	10^-3	10^-3	10^0	10^0	10^-3	10^-3	10^0	10^0	10^-3	10^-3	10^0	10^0
average (inclusions/FOV)	12.2	13.8	0.733333	0.266667	13.2667	11.4	0.133333	0.133333	10.6667	10.9333	0.333333	0.533333
IFU (/ml/well)	12584000		484		1.19387e+07		129.067		1.04544e+07		419.467

## Sheet: RT-qPCR
dacA								dacA																dacAD164N
dacA				Average
	10	14	24		10	14	24
UI-1	0.0262395	0.014406	0.0159538	UI	0.0187814	0.014899	0.0117783
UI-2	0.0188607	0.0177679	0.0100432	I	0.0187814	0.111814	0.161713
UI-3	0.011244	0.0125232	0.00933779	STDEV
I-1	0.0262395	0.0882917	0.226999		10	14	24
I-2	0.0188607	0.111206	0.131224	UI	0.00749806	0.00265689	0.0036333
I-3	0.011244	0.135945	0.126916	I	0.00749806	0.0238322	0.0565808
				P-value	10	14	24
					1	0.00219201	0.0101806
ybbR				Average
	10	14	24		10	14	24
UI-1	0.00837192	0.00362294	0.00257351	UI	0.00554467	0.00367124	0.0018113
UI-2	0.00510861	0.00460705	0.0011496	I	0.00554467	0.0019226	0.000650364
UI-3	0.00315349	0.00278375	0.0017108	STDEV
I-1	0.00837192	0.0015675	0.000804604		10	14	24
I-2	0.00510861	0.00156246	0.000507717	UI	0.0026364	0.000912613	0.000717255
I-3	0.00315349	0.00263783	0.00063877	I	0.0026364	0.000619418	0.000148782
				P-value	10	14	24
					1	0.0515865	0.0516373
hctA				Average
	10	14	24		10	14	24
UI-1	0.00298134	0.000995239	0.0792692	UI	0.00199092	0.000847348	0.063534
UI-2	0.00199709	0.000763212	0.0483564	I	0.00199092	0.000648526	0.00493249
UI-3	0.000994322	0.000783594	0.0629764	STDEV
I-1	0.00298134	0.000511431	0.00538362		10	14	24
I-2	0.00199709	0.000616195	0.00499306	UI	0.000993521	0.000128482	0.0154639
I-3	0.000994322	0.000817951	0.00442079	I	0.000993521	0.000155796	0.000484268
				P-value	10	14	24
					1	0.163337	0.00279227
omcB				Average
	10	14	24		10	14	24
UI-1	0.00134041	0.000623097	0.0157642	UI	0.000742808	0.000424791	0.0105645
UI-2	0.000539902	0.000302618	0.00670748	I	0.000742808	0.000267815	0.0011513
UI-3	0.000348109	0.000348658	0.00922183	STDEV
I-1	0.00134041	0.000289253	0.00144863		10	14	24
I-2	0.000539902	0.000283039	0.00110698	UI	0.000479904	0.000173274	0.00467526
I-3	0.000348109	0.000231154	0.000898283	I	0.00052635	3.19014e-05	0.000277835
				P-value	10	14	24
					1	0.197656	0.0253248
euo				Average
	10	14	24		10	14	24
UI-1	0.0204383	0.00554577	0.0036083	UI	0.0127444	0.0062046	0.00235041
UI-2	0.0120371	0.00731539	0.00156332	I	0.0127444	0.0034898	0.00696506
UI-3	0.00575772	0.00575263	0.00187963	STDEV
I-1	0.0204383	0.00250123	0.00968184		10	14	24
I-2	0.0120371	0.00321858	0.00526034	UI	0.00736581	0.00096752	0.00110078
I-3	0.00575772	0.00474957	0.00595301	I	0.00736581	0.00114845	0.00237815
				P-value	10	14	24
					1	0.0351416	0.0380267
gDNA				Average
	10	14	24		10	14	24
UI-1	0.00932227	0.0579751	0.969816	UI	0.0144362	0.0488783	1.46659
UI-2	0.00854775	0.0303638	1.79127	I	0.0144362	0.0745456	0.169431
UI-3	0.0254385	0.058296	1.63869	STDEV
I-1	0.00932227	0.129283	0.185534		10	14	24
I-2	0.00854775	0.0448963	0.196503	UI	0.00953618	0.0160348	0.436933
I-3	0.0254385	0.0494576	0.126258	I	0.00953618	0.0474587	0.0377896
				P-value	10	14	24
					1	0.424968	0.00687196
Copy #				Average
	10	14	24		10	14	24
UI-3	8304.54	51645.8	863939	UI	12860.2	43542.1	1.30648e+06
UI-4	7614.58	27048.9	1.59571e+06	I	12860.2	66407.4	150934
UI-1	22661.4	51931.7	1.45979e+06	STDEV
I-3	8304.54	115169	165279		10	14	24
I-4	7614.58	39994.9	175050	UI	8495.1	14284.3	389232
I-1	22661.4	44058.2	112474	I	8495.1	42277.6	33664.1
				P-value	10	14	24
					1	0.424968	0.00687196
dacAD164N
dacA				Average
	10	14	24		10	14	24
UI-3	0.0183649	0.0047605	0.00637452	UI	0.0117222	0.00794306	0.00596198
UI-4	0.00706202	0.00986035	0.00716879	I	0.0117222	0.161589	0.0390296
UI-1	0.0097397	0.00920834	0.00434263	STDEV
I-3	0.0183649	0.218361	0.0262014		10	14	24
I-4	0.00706202	0.211086	0.0557516	UI	0.00590647	0.00277539	0.00145754
I-1	0.0097397	0.0553185	0.0351359	I	0.00590647	0.0921045	0.015155
				P-value	10	14	24
					1	0.0446508	0.0197423
ybbR				Average
	10	14	24		10	14	24
UI-3	0.00527787	0.000867094	0.000622463	UI	0.00546986	0.00164259	0.000958794
UI-4	0.00282306	0.00209203	0.00140885	I	0.00546986	0.00296955	0.000459905
UI-1	0.00830864	0.00196866	0.000845073	STDEV
I-3	0.00527787	0.00416843	0.000235056		10	14	24
I-4	0.00282306	0.00316132	0.000774401	UI	0.00274782	0.00067443	0.000405338
I-1	0.00830864	0.00157891	0.000370258	I	0.00274782	0.00130536	0.000280626
				P-value	10	14	24
					1	0.192804	0.154521
hctA				Average
	10	14	24		10	14	24
UI-3	0.00192373	0.000828341	0.117867	UI	0.00155613	0.000988522	0.0648682
UI-4	0.00104202	0.000862614	0.0467633	I	0.00155613	0.00039836	0.00465041
UI-1	0.00170263	0.00127461	0.0299745	STDEV
I-3	0.00192373	0.000420896	0.00305222		10	14	24
I-4	0.00104202	0.000516369	0.00636875	UI	0.000458751	0.000248351	0.0466594
I-1	0.00170263	0.000257814	0.00453027	I	0.000458751	0.000130742	0.00166152
				P-value	10	14	24
					1	0.0219248	0.08922
omcB				Average
	10	14	24		10	14	24
UI-3	0.000524216	0.00010112	0.00680102	UI	0.000286452	0.000257849	0.00558994
UI-4	7.15945e-05	0.00022101	0.00537356	I	0.000286452	0.000158584	0.000525079
UI-1	0.000263547	0.000451417	0.00459524	STDEV
I-3	0.000524216	0.000177662	0.000316207		10	14	24
I-4	7.15945e-05	0.000166944	0.000733455	UI	0.000226832	0.000178031	0.00111869
I-1	0.000263547	0.000131147	0.000525574	I	0.000227178	2.43578e-05	0.000208624
				P-value	10	14	24
					1	0.392837	0.00152393
euo				Average
	10	14	24		10	14	24
UI-3	0.0111383	0.00165565	0.000930709	UI	0.00750866	0.00307308	0.000993267
UI-4	0.00430896	0.00372116	0.00122821	I	0.00750866	0.00364358	0.00360451
UI-1	0.00707875	0.00384244	0.00082088	STDEV
I-3	0.0111383	0.00445984	0.00199792		10	14	24
I-4	0.00430896	0.00440171	0.00561961	UI	0.0034349	0.00122903	0.000210749
I-1	0.00707875	0.00206918	0.00319601	I	0.0034349	0.00136378	0.00184508
				P-value	10	14	24
					1	0.618968	0.0715587
gDNA				Average
	10	14	24		10	14	24
UI-3	0.00570228	0.0217317	0.894378	UI	0.00963661	0.0232617	0.889129
UI-4	0.00956239	0.0163045	0.537199	I	0.00963661	0.0301801	0.0691178
UI-1	0.0136451	0.0317488	1.23581	STDEV
I-3	0.00570228	0.0141944	0.0786914		10	14	24
I-4	0.00956239	0.0223995	0.0565557	UI	0.00397195	0.00783502	0.349335
I-1	0.0136451	0.0539464	0.0721061	I	0.00397195	0.0209871	0.0113664
				P-value	10	14	24
					1	0.621064	0.0153036
Copy #				Average
	10	14	24		10	14	24
UI-3	5079.75	19359.2	796737	UI	8584.56	20722.2	792061
UI-4	8518.44	14524.5	478552	I	8584.56	26885.3	61572
UI-1	12155.5	28282.8	1.10089e+06	STDEV
I-3	5079.75	12644.8	70100.5		10	14	24
I-4	8518.44	19954.1	50381.4	UI	3538.32	6979.65	311197
I-1	12155.5	48056.9	64234.2	I	3538.32	18695.9	10125.5
				P-value	10	14	24
					1	0.621064	0.0153036
