# Supplementary material for: The second messenger signaling molecule cyclic di-AMP drives developmental cycle progression in Chlamydia trachomatis
Source: eLife. 2025 Sep 10;14:RP104240. doi: 10.7554/eLife.104240 (PMC12422730; doi:10.7554/eLife.104240)
Supplement: Figure 3—source data 1. [file elife-104240-fig3-data1.xlsx]

## Sheet: Figure 3 IFU
pBL-dTM_dacA (No tag)
	24 hpi (UI)	24 hpi (UI)	24 hpi (I)	24 hpi (I)	24 hpi (UI)	24 hpi (UI)	24 hpi (I)	24 hpi (I)	24 hpi (UI)	24 hpi (UI)	24 hpi (I)	24 hpi (I)			UI	I	UI	I
#1	8	22	49	40	24	30	19	39	30	41	35	39		1	1.69723e+06	3.97203e+06	100	234.03
#2	9	16	46	51	26	28	24	30	26	40	43	40		2	2.06184e+06	2.70395e+06	100	131.142
#3	21	16	44	46	16	19	21	35	26	24	32	49		3	3068560	4210800	100	137.224
#4	17	26	43	34	22	27	23	32	36	32	33	58		average	2.27588e+06	3.62892e+06	100	167.466
#5	16	25	47	37	21	26	27	15	28	30	44	55		stdev	710280	809902	0	57.727
#6	14	18	44	34	30	31	39	15	18	29	41	54		p-value	0.0952203		0.11295
#7	12	14	36	22	15	20	35	22	37	32	45	41		Relative	100	159.452
#8	23	15	31	40	22	16	47	43	38	40	45	45
#9	14	17	32	54	21	29	23	30	40	38	37	38
#10	15	8	22	55	18	19	36	29	33	27	40	52
#11	24	29	39	42	19	19	27	28	24	36	49	54
#12	18	23	46	40	17	17	29	25	37	34	39	46
#13	14	23	53	45	23	20	18	23	29	32	40	47
#14	15	17	47	28	18	19	22	30	27	24	41	43
#15	12	25	52	32	15	12	31	21	38	25	34	46
Dilution	10^-2	10^-2	10^-2	10^-2	10^-2	10^-2	10^-2	10^-2	10^-2	10^-2	10^-2	10^-2
average (inclusions/FOV)	15.4667	19.6	42.0667	40	20.4667	22.1333	28.0667	27.8	31.1333	32.2667	39.8667	47.1333
IFU (/ml/well)	1.69723e+06		3.97203e+06		2.06184e+06		2.70395e+06		3068560		4210800
pBL-dTM_dacA_D164N (No tag)
	24 hpi (UI)	24 hpi (UI)	24 hpi (I)	24 hpi (I)	24 hpi (UI)	24 hpi (UI)	24 hpi (I)	24 hpi (I)	24 hpi (UI)	24 hpi (UI)	24 hpi (I)	24 hpi (I)			UI	I	UI	I
#1	23	24	22	16	29	29	25	16	29	23	16	14		1	2565200	1.71013e+06	100	66.6667
#2	24	39	26	24	11	28	21	21	20	29	18	18		2	2148960	2.04893e+06	100	95.3453
#3	27	24	28	18	21	21	29	14	43	38	14	21		3	2.69427e+06	1.64237e+06	100	60.9581
#4	28	38	21	26	14	20	19	16	30	33	21	14		average	2.46948e+06	1800480	100	74.3234
#5	19	33	22	19	16	20	25	21	32	28	15	16		stdev	284978	217818	0	18.428
#6	20	25	17	18	18	29	21	17	23	27	20	10		p-value	0.0319609		0.073288
#7	21	32	15	17	21	16	13	25	37	29	13	18		Relative	100	72.9094
#8	30	32	14	13	28	20	17	25	25	23	11	17
#9	26	31	11	16	22	21	24	27	35	25	16	19
#10	28	36	13	22	25	19	11	22	32	17	20	11
#11	21	31	14	25	31	28	18	23	32	25	24	12
#12	14	30	12	21	20	20	19	27	26	29	18	15
#13	18	33	11	11	14	18	24	17	30	19	11	22
#14	15	25	10	12	28	23	22	28	33	23	19	22
#15	21	27	16	20	21	35	22	26	20	20	22	22
Dilution	10^-2	10^-2	10^-2	10^-2	10^-2	10^-2	10^-2	10^-2	10^-2	10^-2	10^-2	10^-2
average (inclusions/FOV)	22.3333	30.6667	16.8	18.5333	21.2667	23.1333	20.6667	21.6667	29.8	25.8667	17.2	16.7333
IFU (/ml/well)	2565200		1.71013e+06		2148960		2.04893e+06		2.69427e+06		1.64237e+06

## Sheet: RT-qPCR
dTMdacA
dacA				Average
	10	14	24		10	14	24
UI-1	0.0111672	0.00701319	0.00186948	UI	0.0109596	0.0115525	0.00327455
UI-2	0.0146825	0.0160457	0.00335522	I	0.0109596	0.053879	0.0373417
UI-3	0.00702911	0.0115986	0.00459894	STDEV
I-1	0.0111672	0.0499011	0.0220088		10	14	24
I-2	0.0146825	0.034377	0.0395206	UI	0.00383091	0.00451641	0.00136652
I-3	0.00702911	0.077359	0.0504958	I	0.00383091	0.0217654	0.0143679
				P-value	10	14	24
					1	0.029989	0.0149955
ybbR				Average
	10	14	24		10	14	24
UI-1	0.00290664	0.00150865	0.000474693	UI	0.0031676	0.00271526	0.00102766
UI-2	0.00441163	0.00407091	0.00151742	I	0.0031676	0.00232496	0.00126386
UI-3	0.00218452	0.00256623	0.00109088	STDEV
I-1	0.00290664	0.00184021	0.000652104		10	14	24
I-2	0.00441163	0.0021726	0.00150912	UI	0.00113626	0.00128762	0.00052423
I-3	0.00218452	0.00296208	0.00163037	I	0.00113626	0.000576249	0.000533257
				P-value	10	14	24
					1	0.65681	0.613404
hctA				Average
	10	14	24		10	14	24
UI-1	0.000447959	0.000249268	0.0112402	UI	0.00118043	0.000695888	0.0290703
UI-2	0.00226427	0.00128813	0.0335047	I	0.00118043	0.000533928	0.0304893
UI-3	0.000829063	0.000550268	0.0424661	STDEV
I-1	0.000447959	0.000355684	0.0205517		10	14	24
I-2	0.00226427	0.000715563	0.0409791	UI	0.000957779	0.00053452	0.0160783
I-3	0.000829063	0.000530538	0.0299369	I	0.000957779	0.000179964	0.0102249
				P-value	10	14	24
					1	0.645021	0.903596
omcB				Average
	10	14	24		10	14	24
UI-1	0.000200847	0.000333327	0.00214316	UI	0.000261376	0.00043668	0.00520686
UI-2	0.000535452	0.000702661	0.00688055	I	0.000261376	0.00033901	0.00463992
UI-3	4.78298e-05	0.000274054	0.00659686	STDEV
I-1	0.000200847	0.000310783	0.00337694		10	14	24
I-2	0.000535452	0.000273028	0.00654568	UI	0.000220252	0.000232244	0.00265703
I-3	4.78298e-05	0.000433218	0.00399714	I	0.000249383	8.37425e-05	0.00167932
				P-value	10	14	24
					1	0.530846	0.770343
euo				Average
	10	14	24		10	14	24
UI-1	0.00539235	0.00270436	0.00048168	UI	0.00615445	0.0054616	0.00133874
UI-2	0.0090754	0.00759505	0.00132752	I	0.00615445	0.00412417	0.00149238
UI-3	0.00399561	0.00608539	0.00220703	STDEV
I-1	0.00539235	0.00336201	0.000766287		10	14	24
I-2	0.0090754	0.00324637	0.00162122	UI	0.00262425	0.0025043	0.000862729
I-3	0.00399561	0.00576413	0.00208962	I	0.00262425	0.00142142	0.000671009
				P-value	10	14	24
					1	0.466225	0.819619
gDNA				Average
	10	14	24		10	14	24
UI-1	0.0179687	0.0521663	2.55947	UI	0.0113154	0.0292293	1.28459
UI-2	0.00664323	0.0177338	0.494148	I	0.0113154	0.0375498	1.14973
UI-3	0.00933415	0.0177876	0.80016	STDEV
I-1	0.0179687	0.0760172	2.3166		10	14	24
I-2	0.00664323	0.0240842	0.563026	UI	0.00591697	0.0198641	1.11463
I-3	0.00933415	0.0125481	0.569561	I	0.00591697	0.0338094	1.01055
				P-value	10	14	24
					1	0.73185	0.884138
Copy #				Average
	10	14	24		10	14	24
UI-1	16007	46471.2	2.28005e+06	UI	10080	26038.2	1.14435e+06
UI-2	5917.97	15797.8	440201	I	10080	33450.4	1.02421e+06
UI-3	8315.12	15845.7	712805	STDEV
I-1	16007	67718.2	2.06369e+06		10	14	24
I-2	5917.97	21454.8	501560	UI	5271	17695.5	992942
I-3	8315.12	11178.2	507381	I	5271	30118.4	900223
				P-value	10	14	24
					1	0.73185	0.884138
dTMdacAD164N
dacA				Average
	10	14	24		10	14	24
UI-4	0.0190648	0.00946169	0.00508199	UI	0.0109298	0.00807579	0.00507272
UI-3	0.00886867	0.00636248	0.0035737	I	0.0109298	0.0954311	0.0428805
UI-5	0.00485587	0.00840318	0.00656246	STDEV
I-4	0.0190648	0.126913	0.0428985		10	14	24
I-3	0.00886867	0.0405326	0.0261522	UI	0.00732526	0.00157533	0.0014944
I-5	0.00485587	0.118847	0.0595909	I	0.00732526	0.0477142	0.0167194
				P-value	10	14	24
					1	0.03388	0.0175242
ybbR				Average
	10	14	24		10	14	24
UI-4	0.00554682	0.0027673	0.00120773	UI	0.00278137	0.00209763	0.00121888
UI-3	0.000936663	0.0018189	0.00089082	I	0.00278137	0.00393728	0.00132486
UI-5	0.00186062	0.00170668	0.0015581	STDEV
I-4	0.00554682	0.00564494	0.00139751		10	14	24
I-3	0.000936663	0.00233536	0.000987305	UI	0.0024391	0.000582661	0.00033378
I-5	0.00186062	0.00383154	0.00158977	I	0.0024391	0.00165732	0.000307734
				P-value	10	14	24
					1	0.143913	0.706655
hctA				Average
	10	14	24		10	14	24
UI-4	0.00245061	0.00125802	0.0664924	UI	0.000946489	0.000637005	0.0622435
UI-3	0.000326177	0.000341624	0.0487819	I	0.000946489	0.000789724	0.0409095
UI-5	6.26779e-05	0.000311372	0.0714561	STDEV
I-4	0.00245061	0.00107306	0.0566558		10	14	24
I-3	0.000326177	0.000636248	0.0305	UI	0.00130926	0.000538026	0.0119193
I-5	6.26779e-05	0.000659861	0.0355727	I	0.00130926	0.000245662	0.0138706
				P-value	10	14	24
					1	0.677859	0.113433
omcB				Average
	10	14	24		10	14	24
UI-4	0.00101183	0.000606229	0.0072051	UI	0.000396381	0.000339239	0.00669165
UI-3	8.09024e-05	0.000171472	0.00457942	I	0.000396381	0.000451088	0.00430602
UI-5	9.64121e-05	0.000240016	0.00829043	STDEV
I-4	0.00101183	0.000321467	0.00563523		10	14	24
I-3	8.09024e-05	0.000363946	0.00328869	UI	0.000507097	0.000233746	0.00190804
I-5	9.64121e-05	0.000667851	0.00399414	I	0.000533049	0.00018892	0.00120396
				P-value	10	14	24
					1	0.554299	0.140988
euo				Average
	10	14	24		10	14	24
UI-4	0.00763073	0.00274408	0.00144051	UI	0.00422355	0.0027653	0.00202512
UI-3	0.00120464	0.00313655	0.00119716	I	0.00422355	0.00612769	0.00137277
UI-5	0.00383529	0.00241528	0.00343769	STDEV
I-4	0.00763073	0.00744329	0.00117348		10	14	24
I-3	0.00120464	0.00326146	0.000922816	UI	0.00323059	0.000361101	0.00122936
I-5	0.00383529	0.0076783	0.00202201	I	0.00323059	0.002485	0.000576057
				P-value	10	14	24
					1	0.0812054	0.452062
gDNA				Average
	10	14	24		10	14	24
UI-4	0.00232157	0.00808985	0.386079	UI	0.00586665	0.0103089	0.330718
UI-3	0.0083747	0.0116735	0.3746	I	0.00586665	0.0113098	0.414328
UI-5	0.00690368	0.0111635	0.231476	STDEV
I-4	0.00232157	0.00749614	0.349571		10	14	24
I-3	0.0083747	0.0169487	0.486692	UI	0.003157	0.00193864	0.0861382
I-5	0.00690368	0.00948462	0.406722	I	0.003157	0.00498358	0.068876
				P-value	10	14	24
					1	0.76204	0.259422
Copy #				Average
	10	14	24		10	14	24
UI-4	2068.12	7206.66	343930	UI	5226.18	9183.49	294613
UI-3	7460.42	10399.1	333704	I	5226.18	10075.1	369095
UI-5	6149.99	9944.73	206205	STDEV
I-4	2068.12	6677.77	311408		10	14	24
I-3	7460.42	15098.3	433559	UI	2812.35	1726.99	76734.3
I-5	6149.99	8449.16	362319	I	2812.35	4439.51	61356.7
				P-value	10	14	24
					1	0.76204	0.259422
