# Supplementary material for: The second messenger signaling molecule cyclic di-AMP drives developmental cycle progression in Chlamydia trachomatis
Source: eLife. 2025 Sep 10;14:RP104240. doi: 10.7554/eLife.104240 (PMC12422730; doi:10.7554/eLife.104240)
Supplement: Figure 4—figure supplement 1—source data 1. [file elife-104240-fig4-figsupp1-data1.xlsx]

## Sheet: Organism Size
		dacA-KD					dacA-KDcom
		UI	I				UI	I
221026_1	1	1.494	2.91	221026_1	1	1	0.792	1.732	1
	2	1.387	1.833			2	0.74	1.322
	3	0.904	1.341			3	0.806	1.121
	4	0.955	2.461			4	0.811	2.767	2
	5	0.746	2.659			5	0.72	1.933
	6	0.866	2.129			6	0.872	1.709
	7	1.537	1.296			7	0.972	1.315
	8	0.921	1.915			8	0.91	1.319	3
	9	0.876	1.852			9	0.967	1.415
	10	0.94	2.167	221026_2		10	1.02	1.539
	11	0.723	2.294			11	0.834	1.641
	12	0.741	2.266			12	0.898	1.237
	13	0.896	1.634			13	1.018	0.76
	14	0.828	1.386			14	0.934	1.354	4
	15	1.105	1.395			15	0.539	1.331
	16	0.729	1.938			16	0.972	1.314
	17	0.816	1.263			17	0.948	1.073
	18	1.062	1.703			18	0.734	1.298
	19	1.038	1.132			19	0.943	1.146
	20	0.829	1.119		2	20	1.256	1.31
	21	0.801	2.817	221026_3		21	0.906	1.941	5
	22	0.858	1.781			22	0.813	2.001
	23	0.816	1.889			23	1.249	1.297
221026_2	24	0.828	1.701			24	0.742	1.23
	25	0.984	1.729			25	0.813	1.572
	26	0.804	1.479			26	0.619	1.537	6
	27	0.63	1.678			27	0.593	1.368
	28	0.951	1.3			28	0.945	1.135
	29	1.236	3.223	230110_1	3	29	1.046	1.381
	30	1.087	2.095			30	0.987	1.077	7
	31	0.994	1.979			31	1.101	1.041
	32	0.836	1.077			32	0.59	0.957
	33	0.961	2.015			33	0.974	1.402	8
	34	0.727	1.909			34	1.015	1.334
	35	0.719	1.465			35	0.934	1.3
	36	1.267	1.957	230110_2		36	0.721	1.909
	37	0.836	2.192		4	37	1.269	1.213
	38	0.753	1.231			38	1.204	1.405
	39	0.659	1.822			39	1.047	2.522	9
	40	0.815	2.137			40	0.812	1.046
221026_3	41	0.998	2.07		5	41	1.427	1.31
	42	0.765	1.408			42	1.494	2.005
	43	1.193	1.503			43	0.801	1.693	10
	44	0.815	1.298			44	0.896	1.79
	45	0.679	1.595			45	0.91	1.6
	46	0.833	1.967			46	1.234	1.6
	47	0.719	1.921			47	1.342	1.204
	48	0.641	1.63			48	0.972	1.603
	49	0.851	2.832	230110_3		49	1.014	1.6	11
	50	0.684	1.94			50	1.14	1.416
	51	0.749	2.055			51	0.615	1.442
	52	0.803	1.376			52	0.841	1.522
	53	0.834	1.395			53	0.79	1.541
230110_1	54	1.478	1.374			54	1.108	0.991
	55	1.053	1.247		6	55	1.537	1.146
	56	0.921	1.048			56	1.161	1.556	12
	57	0.911	1.689			57	0.701	2.452
	58	0.753	2.164	230110_4		58	1.453	1.24
	59	0.73	1.936			59	1.12	1.373
	60	0.73	1.749			60	1.015	2.201	13
	61	1.091	1.429			61	1.334	2.029
	62	0.755	2.177			62	0.976	1.461
230110_2	63	0.961	2.124			63	0.93	1.367
	64	1.152	3.046	220824_1		64	0.834	1.104
	65	1.103	1.601			65	1.278	1.64
	66	0.838	1.595			66	0.641	1.94	14
	67	0.788	2.62			67	0.803	1.149
	68	0.935	1.7		7	68	1.128	1.768	15
	69	0.814	1.89			69	0.991	1.452
	70	0.639	2.832			70	1.09	1.415
	71	1.005	0.943			71	1.001	1.245	16
	72	0.812	2.62			72	1.535	1.054
	73	0.669	1.128			73	1.526	1.5
	74	0.828	2.043			74	0.927	1.287
230110_3	75	1.373	1.54			75	0.991	2.14	17
	76	0.95	1.501			76	1.014	1.44
	77	0.663	2.104	220824_2	8	77	1.344	1.362
	78	0.654	2.123			78	1.234	1.801
	79	0.815	1.522			79	1.267	1.509
	80	1.106	2.404			80	1.424	2.134	18
	81	0.565	1.479			81	1.419	1.858
	82	0.679	1.641			82	1.342	1.391
	83	0.691	0.823			83	1.132	1.08	19
	84	0.677	1.092			84	1.345	1.311
	85	0.665	2.65	220824_3		85	1.202	1.391
230110_4	86	1.13	1.777			86	1.351	1.467
	87	0.856	2.709			87	1.182	1.22
	88	0.708	1.655			88	1.447	1.775	20
	89	0.64	1.867			89	1.529	1.529
	90	0.906	1.609			90	1.046	1.1
	91	0.991	1.096		9	91	1.904	1.044
	92	0.995	1.288			92	0.781	1.149
	93	0.823	1.166			93	0.781	1.204
	94	0.713	1.47			94	0.828	2.265	21
	95	0.947	1.344			95	0.971	1.452
	96	1.338	1.245			96	1.569	1.625
	97	1.22	1.721			97	1.383	1.248
	98	1.007	1.415			98	1.124	1.148
	99	1.054	1.354			99	1.04	1.479
	100	0.711	1.853			100	0.808	1.797
	101	0.823	2.145			101	0.814	0.803
	102	0.891	1.416	220824_4		102	0.985	1.276	22
	103	0.947	1.703			103	0.863	1.488
	104	0.81	2.799			104	0.971	1.465
	105	0.857	1.953			105	1.051	1.481
	106	0.7	1.242		10	106	1.063	1.254
220824_1	107	1.37	1.031			107	0.941	1.188
	108	1.054	1.432			108	1.104	1.632	23
	109	1.287	1.387			109	1.241	1.08
	110	0.86	1.365			110	1.204	1.647
	111	1.059	1.415			111	1.461	1.715
	112	0.898	1.557			112	0.9	1.487	24
220824_2	113	1.521	1.471			113	1.043	1.582
	114	1.687	1.365			114	1.034	1.923
	115	0.918	1.172			115	0.662	1.278
	116	0.86	1.188		11	116	1.333	1.675	25
	117	0.75	1.458			117	1.018	0.943
	118	0.85	1.373			118	1.11	1.703	26
	119	1.36	1.151			119	1.205	1.169
	120	1.044	2.983	220824_5		120	0.96	0.943
	121	0.765	3.276			121	1.086	1.427
	122	1.93	3.556			122	0.86	0.647
	123	0.86	1.351			123	1.344	1.197
	124	0.707	2.419		12	124	1.886	1.509	27
	125	0.922	1.281			125	1.11	1.74
	126	1.005	1.676			126	0.626	1.803
	127		1.551			127	0.775	1.262
	128		2.036			128	0.854	1.534	28
	129		2.04	3.72334		129	0.92	1.092
	Average	0.921405	1.77794	1.92959		130	1.133	1.91
			2.93015e-41			131	0.971	1.464
						132	1.349	1.405
					13	133	1.138	1.9	29
						134	1.212	1.595
						135	1.202	1.649
						136	1.202	1.108
						137	1.494	0.989
						138	1.541	0.889
						139	1.255	1.468	30
						140	0.844	1.647
					14	141	0.987	1.74	31
						142	1.492	2.267
						143	1.453
						144	1.379
						145	1.204
						146	1.254
						147	0.939
						148
						149
							1.06505	1.46404	1.37462
								1.60494e-23

## Sheet: Inclusion size
	dacA-KD						dacAKDcom
		UI	I				UI	I
qPCR221026	1	169.14	196.97	qPCR221026	qPCR_1	1	103.32	82.91	1
	2	123.45	125.94			2	109.97	34.73
	3	163.8	134.91			3	94.05	65.91
	4	84.12	158.35			4	129.54	39.63
	5	197.12	203.89			5	52.78	21.9
	6	71.58	126.05			6	69.21	21.91
	7	176.29	145.56			7	163	44.78
	8	67.03	72.43			8	83.09	37.49
	9	128.03	105.79			9	132.09	53.87
	10	279.53	212.87			10	93.02	29.15
	11	255.54	145.92			11	89	52.61
	12	157.22	111.53			12	84.25	26.92
	13	162.19	35.26			13	110.91	40.2
qPCR230113	14	123.46	83.55			14	110.14	42.09
	15	108.77	112.04			15	166.75	27.15
	16	97.11	122.88	qPCR230113		16	120.23	23.98
	17	79.4	153.6			17	109.48	30.7
	18	155.12	121.74			18	126.85	34.69
	19	88.32	133.12			19	142.89	40.55
	20	173.83	163.63			20	103.09	15.89
	21	129.98	122.3			21	105.94	22.41
	22	172.8	113.15			22	108.73	31.58
	23	147.68	110.66		qPCR_2	23	119.96	18.62
	24	100.13	114.7			24	62.29	50.31
	25	165.96	128.07		qPCR_3	25	146.71	39.91
	26	128.26	188.29	IFU		26	107.09	64.47
IFU	27	145.3	147.51			27	201.63	18.5
	28	203.88	176.28			28	161.18	29.72
	29	235.92	249.98			29	129.42	29.28
	30	218.11				30	156.09	38.44
		144.823	138.516	1.04553		31	142.25	17.13
			0.362561			32	175.32	40.09
						33	73.58	14.67
						34	207.35	38.66
						35	212.37	82.75
						36	128.95	22.4
						37	47.04	32.15
						38	85.53	31.57
						39	103.99	27.03	2
						40	106.49	49.49
						41	135.91	39.18
						42	107.69	102.57
						43	130.7	102.36
						44	143.2	46.3
						45	204.21	43.96
						46	230.08	21.47
						47	113.29	32.95	3
						48	65.75	36.16
						49	77.41	9.05
						50	142.37	13.74
						51	85.87	43.24
						52	196.3	54.07
						53	59.41	61.33
						54	139.53	25.61
						55	174.88	20.12
						56	62.83	34.53
						57	177.5	49.47
						58	205.25	31.23
						59	44.79	18.45
						60	156.61	36.26
						61	57.85
						62	79.15
							122.035	38.1382	3.1998
								5.82046e-25
