# Supplementary material for: The second messenger signaling molecule cyclic di-AMP drives developmental cycle progression in Chlamydia trachomatis
Source: eLife. 2025 Sep 10;14:RP104240. doi: 10.7554/eLife.104240 (PMC12422730; doi:10.7554/eLife.104240)
Supplement: Figure 4—source data 1. [file elife-104240-fig4-data1.xlsx]

## Sheet: IFU Summary Data
DacA-KD
	Raw		Relative
	UI	I	UI	I
IFU-1	265232	18746.9	100	7.06813
IFU-2	118882	40081.2	100	33.715
IFU-3	223548	37752	100	16.8877
IFU-4
Average			100	19.2236
STDEV			0	13.4761
P-value				0.000486003
DacA-KD		UI	I
	Average	100	19.2236
	STDEV	0	13.4761
dacAKDcom
IFU (/ml/well)	UI	I
#1	4646400	2.07797e+06
#2	4.4528e+06	2.77171e+06
#3	4.90453e+06	1.41651e+06
Relative Ratio	UI	I
#1	100	44.7222
#2	100	62.2464
#3	100	28.8816
	UI	I
Average	100	45.2834
STDEV	0	16.6895
p-value		0.0047463

## Sheet: dacAKD_IFU rep 1
pBOMBL12CRia-dacA-IGR IFU
	UI-MOMP_1	UI-MOMP_2	I-MOMP	I-MOMP
#1	23	46	12	12
#2	19	39	13	23
#3	25	31	14	23
#4	21	17	12	5
#5	21	15	38	16
#6	20	14	39	15
#7	20	17	33	10
#8	16	20	16	9
#9	22	19	12	15
#10	17	18	9	18
#11	41	16	20	22
#12	61	26	33	14
#13	63	22	27	7
#14	62	27	28	32
#15	41	23	33	21
Dilution	10^-1	10^-1	10^0	10^0
average (inclusions/FOV)	31.5	23.3	22.6	16.1
IFU (/ml/well)	265232		18746.9
Ratio		100		7.06813

## Sheet: dacAKD_IFU reps 2&3
pBOMBL12CRia-dacA-IGR IFU
	UI-MOMP_2		I-MOMP_2		UI-MOMP-3		I-MOMP-3
#1	10	12	43	35	20	21	43	46
#2	16	13	34	36	21	21	38	37
#3	12	16	49	49	17	25	39	37
#4	10	11	45	33	21	21	40	41
#5	10	10	39	43	29	37	39	38
#6	15	7	40	44	18	20	44	47
#7	9	13	42	31	29	24	37	35
#8	8	14	34	49	28	21	36	36
#9	13	17	42	48	30	19	39	39
#10	11	13	61	35	19	19	34	41
#11	12	10	47	35	21	29	37	32
#12	16	9	57	29	16	31	32	44
#13	15	13	52	44	23	21	44	34
#14	8	15	39	33	21	26	40	40
#15	11	16	30	44	25	22	44	50
#16	11	17	38	45	22	22	34	31
Dilution	10^-1	10^-1	10^0	10^0	10^-1	10^-1	10^0	10^0
average (inclusions/FOV)	11.7	12.9	43.3	39.6	22.5	23.7	38.8	39.3
IFU (/ml/well)	118882		40081.3		223548		37752

## Sheet: dacAKDcom_IFU
	1				2				3
	UI (10^-3)		I(10^-2)		UI (10^-3)		I(10^-2)		UI (10^-3)		I(10^-2)
	MOMP	MOMP	MOMP	MOMP	MOMP	MOMP	MOMP	MOMP	MOMP	MOMP	MOMP	MOMP
#1	11	7	25	27	5	6	29	34	3	2	23	20
#2	3	7	15	22	4	4	17	29	5	5	20	25
#3	5	4	18	27	3	4	25	33	8	4	16	24
#4	2	2	17	29	3	6	28	35	4	9	11	17
#5	4	3	21	18	2	6	35	25	3	8	14	10
#6	3	2	14	18	7	4	23	30	6	5	17	15
#7	5	4	23	26	4	2	31	36	1	5	8	8
#8	3	9	23	23	5	4	20	27	6	4	13	14
#9	3	6	27	19	5	8	30	30	4	3	9	16
#10	9	2	12	32	5	7	33	29	8	5	6	13
#11	4	4	17	19	6	3	24	35	5	5	12	22
#12	4	4	27	20	4	4	25	20	6	4	10	8
#13	6	3	16	16	4	4	29	33	6	6	17	10
#14	8	3	26	22	6	6	27	35	6	6	14	21
#15	9	5	23	22	4	3	26	26	6	4	17	9
Dilution	10^-3	10^-3	10^-2	10^-2	10^-3	10^-3	10^-2	10^-2	10^-3	10^-3	10^-2	10^-2
average (inclusions/FOV)	5.26667	4.33333	20.2667	22.6667	4.46667	4.73333	26.8	30.4667	5.13333	5	13.8	15.4667

## Sheet: dacAKD - RT-qPCR
dacA				Average
	10	14	24		10	14	24
UI-1				UI	0.0469002	0.0646696	0.0183929
UI-2	0.0393912	0.0533987	0.0202965	I	0.0469002	0.00799606	0.0035251
UI-3	0.0524089	0.0855723	0.0187895
UI-5	0.0489005	0.0550377	0.0160928	STDEV
I-1					10	14	24
I-2	0.0393912	0.00700086	0.00261332	UI	0.00673545	0.0181208	0.00212972
I-3	0.0524089	0.00603907	0.00377982	I	0.00673545	0.00260151	0.000814853
I-5	0.0489005	0.0109483	0.00418217	P-value	10	14	24
					1	0.00583823	0.000350353
omcB				Average
	10	14	24		10	14	24
UI-1				UI	0.00263512	0.00455803	0.0562613
UI-2	0.00263222	0.00372499	0.0586892	I	0.00263512	0.00789318	0.0173735
UI-3	0.00249329	0.00450733	0.0611809
UI-5	0.00277985	0.00544179	0.0489139	STDEV
I-1					10	14	24
I-2	0.00263222	0.00615446	0.0139204	UI	0.000143303	0.000859524	0.00648387
I-3	0.00249329	0.00446638	0.0178008	I	0.000143303	0.00455241	0.00326062
I-5	0.00277985	0.0130587	0.0203995	P-value	10	14	24
					1	0.280464	0.000749773
euo				Average
	10	14	24		10	14	24
UI-1				UI	0.0613694	0.0503001	0.03027
UI-2	0.0538877	0.0449968	0.0330175	I	0.0613694	0.116844	0.0443495
UI-3	0.0598133	0.0607616	0.0312322
UI-5	0.0704071	0.045142	0.0265604	STDEV
I-1					10	14	24
I-2	0.0538877	0.10538	0.0359304	UI	0.00836892	0.00906021	0.00333438
I-3	0.0598133	0.0790945	0.0487447	I	0.00836892	0.0446001	0.00729351
I-5	0.0704071	0.166057	0.0483735	P-value	10	14	24
					1	0.0644926	0.0383698
ct011				Average
	10	14	24		10	14	24
UI-1				UI	0.0210982	0.0273372	0.0100621
UI-2	0.0174811	0.024297	0.0125183	I	0.0210982	0.0101999	0.00462674
UI-3	0.0264981	0.0366113	0.0103785
UI-5	0.0193154	0.0211032	0.0072893	STDEV
I-1					10	14	24
I-2	0.0174811	0.00945343	0.00431927	UI	0.00476552	0.00818884	0.00262884
I-3	0.0264981	0.00886887	0.00521864	I	0.00476552	0.00182269	0.000512731
I-5	0.0193154	0.0122773	0.00434231	P-value	10	14	24
					1	0.0240526	0.0245628
gDNA				Average
	10	14	24		10	14	24
UI-1				UI	0.00396444	0.0109875	0.274558
UI-2	0.00477917	0.0163416	0.335168	I	0.00396444	0.01249	0.245781
UI-3	0.00613506	0.0136468	0.344175
UI-5	0.000979087	0.00297421	0.144332	STDEV
I-1					10	14	24
I-2	0.00477917	0.0161536	0.267565	UI	0.0026728	0.00706933	0.112869
I-3	0.00613506	0.0175849	0.314903	I	0.0026728	0.00761878	0.0822068
I-5	0.000979087	0.00373153	0.154877	P-value	10	14	24
					1	0.814617	0.739159
hctA				Average
	10	14	24		10	14	24
UI-1				UI	0.00311779	0.00549237	0.222479
UI-2	0.00175177	0.00561847	0.265636	I	0.00311779	0.00732651	0.0721717
UI-3	0.00290459	0.00733304	0.243928
UI-5	0.00469701	0.0035256	0.157874	STDEV
I-1					10	14	24
I-2	0.00175177	0.00674301	0.0563279	UI	0.00148415	0.00190685	0.0569933
I-3	0.00290459	0.00580353	0.0853647	I	0.00148415	0.00188377	0.0146988
I-5	0.00469701	0.00943299	0.0748224	P-value	10	14	24
					1	0.301542	0.0114825
Copy number				Average
	10	14	24		10	14	24
UI-1				UI	3531.63	9787.99	244584
UI-2	4257.42	14557.5	298577	I	3531.63	11126.5	218949
UI-3	5465.28	12157	306601
UI-5	872.198	2649.51	128575	STDEV
I-1					10	14	24
I-2	4257.42	14390.1	238354	UI	2381	6297.55	100547
I-3	5465.28	15665.2	280524	I	2381	6787.02	73232.1
I-5	872.198	3324.15	137969	P-value	10	14	24
					1	0.814617	0.739159

## Sheet: dacAKDcom - RT-qPCR
dacA				Average
	10	14	24		10	14	24
UI-1	0.0947024	0.137222	0.0770173	UI	0.0665894	0.107787	0.0778872
UI-2	0.0151394	0.127078	0.100229	I	0.0556785	0.511119	0.328649
UI-3	0.108011	0.10696	0.0673188
UI-4	0.0485049	0.0598874	0.0669833	STDEV
I-1	0.0510587	0.475981	0.174163		10	14	24
I-2	0.0151394	0.620044	0.34658	UI	0.0427404	0.0343202	0.0156047
I-3	0.108011	0.459928	0.594087	I	0.0385353	0.0735537	0.192575
I-4	0.0485049	0.488524	0.199765	P-value	10	14	24
					0.717599	5.99974e-05	0.040893
omcB				Average
	10	14	24		10	14	24
UI-1	0.00306514	0.00692454	0.112683	UI	0.00416988	0.00584383	0.0951103
UI-2	0.00100386	0.00640563	0.119808	I	0.00416988	0.00879632	0.17914
UI-3	0.00726373	0.00523729	0.0696342
UI-4	0.0053468	0.00480785	0.078316	STDEV
I-1	0.00306514	0.0100398	0.145192		10	14	24
I-2	0.00100386	0.0116503	0.201526	UI	0.00272037	0.000987372	0.0248318
I-3	0.00726373	0.00576052	0.267019	I	0.00272037	0.00258423	0.0711827
I-4	0.0053468	0.00773467	0.102821	P-value	10	14	24
					1	0.0767293	0.06734
hctA				Average
	10	14	24		10	14	24
UI-1	0.00302744	0.00505561	0.182866	UI	0.00743208	0.00555394	0.214599
UI-2	0.00178356	0.00538793	0.230024	I	0.00743208	0.0424547	0.199278
UI-3	0.0134477	0.00728959	0.177899
UI-4	0.0114696	0.00448263	0.267608	STDEV
I-1	0.00302744	0.0493406	0.136521		10	14	24
I-2	0.00178356	0.047709	0.201554	UI	0.00588207	0.00121601	0.0424331
I-3	0.0134477	0.0371783	0.298208	I	0.00588207	0.00707048	0.0712021
I-4	0.0114696	0.035591	0.160828	P-value	10	14	24
					1	4.92793e-05	0.724308
ct011				Average
	10	14	24		10	14	24
UI-1	0.0434962	0.143585	0.0922409	UI	0.0492735	0.119457	0.0841765
UI-2	0.0164131	0.151599	0.0962123	I	0.0492735	0.264478	0.187183
UI-3	0.0999721	0.120786	0.0720234
UI-4	0.0372124	0.0618556	0.0762293	STDEV
I-1	0.0434962	0.272776	0.0977726		10	14	24
I-2	0.0164131	0.326477	0.211849	UI	0.0357258	0.0405586	0.0118427
I-3	0.0999721	0.213063	0.31695	I	0.0357258	0.0480027	0.0994486
I-4	0.0372124	0.245596	0.12216	P-value	10	14	24
					1	0.00363305	0.0854089
euo				Average
	10	14	24		10	14	24
UI-1	0.0726547	0.0987365	0.051102	UI	0.0722816	0.0765611	0.0469015
UI-2	0.0339468	0.0897321	0.0547911	I	0.0722816	0.0692117	0.048519
UI-3	0.113352	0.0746789	0.0397229
UI-4	0.0691733	0.0430969	0.0419901	STDEV
I-1	0.0726547	0.074485	0.0368107		10	14	24
I-2	0.0339468	0.0954743	0.0598629	UI	0.0324865	0.0244173	0.00720055
I-3	0.113352	0.0511115	0.0754154	I	0.0324865	0.0202128	0.0237566
I-4	0.0691733	0.0557757	0.0219872	P-value	10	14	24
					1	0.659197	0.900574
gDNA				Average
	10	14	24		10	14	24
UI-1	0.0998425	0.229227	4.08605	UI	0.0652439	0.155543	2.98724
UI-2	0.0878406	0.182687	1.91894	I	0.0652439	0.146449	0.695177
UI-3	0.047912	0.110551	3.48062
UI-4	0.0253806	0.0997075	2.46334	STDEV
I-1	0.0998425	0.205199	0.634101		10	14	24
I-2	0.0878406	0.170975	0.853037	UI	0.0346273	0.061395	0.977503
I-3	0.047912	0.153652	0.837033	I	0.0346273	0.0640086	0.187725
I-4	0.0253806	0.0559704	0.456537	P-value	10	14	24
					1	0.844292	0.00367091
Copy number				Average
	10	14	24		10	14	24
UI-1	88942.5	204202	3.63996e+06	UI	58121.1	138562	2.66111e+06
UI-2	78250.8	162743	1.70944e+06	I	58121.1	130461	619283
UI-3	42681.3	98482.3	3.10063e+06
UI-4	22609.8	88822.2	2.19441e+06	STDEV
I-1	88942.5	182797	564875		10	14	24
I-2	78250.8	152309	759909	UI	30847	54692.4	870787
I-3	42681.3	136877	745652	I	30847	57020.6	167231
I-4	22609.8	49860	406696	P-value	10	14	24
					1	0.844292	0.00367091
