# Supplementary material for: The second messenger signaling molecule cyclic di-AMP drives developmental cycle progression in Chlamydia trachomatis
Source: eLife. 2025 Sep 10;14:RP104240. doi: 10.7554/eLife.104240 (PMC12422730; doi:10.7554/eLife.104240)
Supplement: Figure 5—figure supplement 1—source data 1. [file elife-104240-fig5-figsupp1-data1.xlsx]

## Sheet: Organism Size
		dacAop						dacAopMut
		UI	I					UI	I
230203_1	1	0.975	1.78	230203_1	1	1	1	1.16	2.698	1	1
	2	1.044	1.781				2	1.076	2.247
	3	1.15	1.645				3	1.429	2.938
	4	0.849	1.671				4	0.953	3.027
	5	0.796	1.191				5	0.84	3.213
	6	0.708	1.154				6	0.983	2.593
	7	0.846	0.948			2	7	1.041	1.618
	8	0.85	1.388				8	1.14	2.117	2
	9	0.594	1.303				9	0.875	2.147
	10	1.089	1.035				10	0.836	1.416
	11	1.07	1.474				11	1.034	2.005	3
	12	0.9	1.179				12	0.994	1.609
	13	0.989	0.887				13	0.974	1.787
	14	0.868	0.737				14	0.955	1.257
	15	0.75	0.74				15	1.016	1.333
	16	0.85	0.585				16	1.063	1.655
	17	0.746	0.989				17	0.875	1.606
	18	0.76	1.28				18	0.875	2.101	4
	19	0.896	1.07				19	0.983	1.692
	20	0.8	0.832			3	20	1.092	1.653
230203_2	21	0.862	0.867				21	1.195	1.36
	22	0.706	0.817				22	1.027	1.693
	23	0.538	1.076				23	0.828	1.729
	24	0.759	0.763				24	0.929	1.876
	25	0.569	0.618				25	0.8	1.493
	26	0.922	1.351				26	0.806	2.816	5
	27	0.907	1.349	230203_2			27	0.767	1.775
	28	0.655	1.214				28	0.939	1.958
	29	0.914	1.25				29	0.93	1.151
	30	0.925	1.124				30	0.76	1.791
	31	0.778	0.619				31	0.836	2.34
	32	0.781	0.659				32	0.745	2.872	6
	33	0.746	0.698				33	0.836	3.549
	34	0.74	1.347				34	0.657	1.96
	35	0.764	1.052				35	0.907	1.603
	36	0.649	0.672			4	36	1.114	2.044
	37	0.853	0.982				37	1.015	1.67
	38	0.799	1.047				38	0.948	2.295	7
	39	0.558	0.695				39	0.854	1.191
230203_3	40	1.651	0.956				40	0.731	1.621
	41	0.794	1.169				41	0.939	1.255
	42	0.789	0.695				42	0.886	1.595	8
	43	0.723	0.918				43	0.981	2.171
	44	0.875	0.795				44	0.901	1.602
	45	0.874	0.642				45	0.696	2.014
	46	0.506	0.677				46	0.91	1.392
	47	0.585	0.675			5	47	1.167	1.692
	48	0.642	2.053	230203_3			48	1.05	1.79	9
230203_4	49	0.896	1.398				49	1.534	1.35
	50	0.763	0.827				50	0.918	1.436
	51	0.675	0.781				51	0.992	2.007
	52	0.832	1.978	230203_4			52	1.012	1.297
	53	0.665	1.448				53	1.141	1.854
	54	0.642	1.616				54	1.063	1.729
	55	0.634	1.025				55	1.134	1.149
	56	0.781	0.759				56	0.966	1.708
	57	0.858	0.907				57	0.854	1.631
	58	0.642	0.677				58	0.886	1.407
	59	0.634	0.543				59	0.75	1.443
	60	0.789	0.635				60	1.012	1.466
	61	0.778	0.636				61	1.18	1.501
	62	0.636	0.527				62	1.101	2.041	10	2
	63	0.646	1.115				63	1.012	1.707
	64	0.596	0.81				64	1.077	2.452
	65	0.55	1.717				65	0.781	1.421
	66	0.601	0.754				66	1.167	2.202
	67	0.649	0.763				67	1.11	1.254
	68	0.434	1.042				68	0.918	1.166
	69	0.737	0.601				69	0.763	1.278
	70	0.874	0.814				70	0.851	1.29
230217_1	71	1.188	0.667				71	0.602	1.803
	72	0.984	0.585		2	6	72	1.14	1.476	11
	73	0.932	0.803				73	0.992	1.747
	74	0.729	1.174				74	1.209	2.402
	75	1.736	1.289				75	1.14	1.7
	76	1.002	0.832				76	1.235	1.516
	77	1.438	0.947	230203_5			77	0.985	1.609
	78	1.336	1.227				78	1.167	2.068
	79	1.94	0.989				79	1.342	1.506
	80	0.737	1.036				80	0.962	2.952	12
	81	1.015	0.822			7	81	1.665	2.178
	82	0.922	1.334				82	0.934	1.589
	83	1.024	0.778				83	1.04	2.351
	84	0.619	0.682				84	1.031	2.462
	85	0.732	1.769	230217_1			85	0.971	2.088	13
	86	0.593	1.468				86	1.345	2.54
	87	1.136	1.477				87	1.32	1.7
	88	0.789	1.298				88	1.151	0.843
	89	1.299	1.596				89	1.055	1.829
	90	1.19	0.893			8	90	1.191	1.935
	91	0.954	1.157				91	1.146	1.458
	92	1.063	0.984				92	1.104	1.281
	93	0.907	0.959				93	0.999	1.548
	94	0.931	1.641				94	1.027	2.025	14
	95	1.003	2.295	230217_2			95	1.17	1.991
	96	0.956	1.452			9	96	1.124	1.942
230217_2	97	1.106	0.962				97	1.03	1.956
	98	0.961	1.097				98	1.016	1.874	15
	99	0.954	1.163				99	1.008	2.086
	100	1.11	1.908	230217_3			100	0.806	1.818
	101	0.981	1.734				101	0.976	1.818
	102	1.06	1.7				102	0.994	2.358
	103	0.603	1.737				103	0.701	2.018
	104	0.625	1.495				104	0.713	1.44
	105	0.859	1.267				105	0.897	1.733
	106	0.9	1.81				106	0.897	1.557
	107	0.89	1.887			10	107	1.093	1.253
	108	0.799	1.937				108	1.17	1.29
230331_1	109	0.574	1.503				109	0.687	1.5
	110	0.776	1.738				110	0.949	1.414
	111	0.872	1.95	230331_1			111	0.736	1.304
	112	0.812	1.395				112	1.054	1.736
	113	0.807	1.008				113	0.615	1.834
	114	0.698	0.998		3	11	114	1.075	1.443
	115	0.65	0.675				115	0.91	1.46
230331_2	116	0.853	1.192				116	0.955	1.312
	117	1.052	0.837	230331_2			117	0.687	1.355	16
	118	0.677	1.057				118	0.801	2.067
	119	0.817	1.452			12	119	0.76	1.185
230331_3	120	0.831	1.892				120	0.854	1.458
	121	0.872	0.711				121	0.62	1.866
	122	0.659	1.705	230331_3			122	0.583	1.687
	123	0.756	0.985				123	0.76	0.966
	124	0.621	1.073				124	0.852	1.645
	125	0.733	1.521				125		1.605
	126		0.94	230331_4			126		2.037
	127		1.364				127		1.47
	128		1.137				128		1.085
	129		1.703				129		1.61
	130		1.073				130		1.221
	131		0.999	1.82101			131		1.152
	Average	0.846152	1.14184	1.34945			132		2.092	17	3
			9.01479e-12				133		1.656
							134		1.311
							135		2.136
							136		2.179
							137		2.059
							138		1.536
							139		1.135
							140		1.437	18
							141		1.854
							142		1.404
							143		1.367
							144		1.294
							145		1.462
							146		2.086	19
							147		1.612
							148		1.464
							149		1.535
							150		1.791	3.15796
								0.965311	1.71542	1.77706
									6.49791e-39

## Sheet: Inclusion size
	dacAop						dacAopMut
		UI	I					UI	I
qPCR230216	1	72.6	49.33	qPCR230216		IFU_1	1	77.4	133.67	IFU_1
	2	260.65	34.97				2	208.36	75.76
	3	351.46	48.25				3	146.34	41.82
	4	182.86	79.65				4	155.47	101.97
	5	169.36	88.04				5	131.85	64.81
	6	169.5	40.44				6	169.52	141.36
	7	169.99	57.96				7	150.62	63.17
	8	106.34	34.82				8	390.34	93
	9	156.55	27.67				9	127.21	111.18
	10	255.5	34.16				10	161.09	161.78
	11	132.57	61.49				11	295.86	50.57
	12	236.46	39.19				12	109.95	27.33
	13	178.08	46.82				13	190.41	88.88
	14	72.58	80.97				14	137.32	26.17
	15	37.77	25.47				15	104.08	55.5
	16	200.59	34.61				16	95.53	37.02
	17	155.27	50.68				17	100.64	93.94
	18	270.47	33.98				18	286.43	71.25
	19	217.32	46.98				19	321.29	55.59
	20	91.25	64.51				20	238.23	71.02
	21	184.45	126.45				21	134.9	114.94	IFU_2
	22	154.21	47.59				22	359.73	76.08
	23	163.27	114.14				23	117.52	85.56
	24	252.9	61.49			IFU_2	24	219.11	54.16
	25	138.29	40.58				25	101.48	110.32
qPCR230330	26	133.94	56.6				26	131.74	115.47
	27	152.35	61.71				27	237.51	134.07
	28	98.82	68.49				28	168.98	82.26
	29	150.92	194.43				29	193.43	170.46
	30	137.74	56.74				30	176.95	20.35
	31	153.74	48.57				31	125.6	154.6
	32	48.15	49.47				32	203.51	38.53
	33	112.09	87.05				33	199.9	123.81
	34	193.45	41.24	qPCR230330			34	193.9	22.02
	35	111.69	46.16				35	222.67	83.58
	36	145.94	25.08				36	227.51	19.24
	37	87.21	43.18				37	86.68	53.14
	38	198.28	52.22				38	267.06	42.17
	39	190.58	61.63				39	160.15	97.96
	40	178.84	15.06				40	106.88	45.64
	41	88.88	29.09				41	249.54	99.64
	42	67.71	58.01				42	225.14	112.92
	43	178.93	41.51				43	165.63	70.48
	44	148.5	39				44	263.8	101.48
	45	45.91	27.03				45	181.89	61.25
	46	98.8	51.23				46	85.36	64.69
	47	281.99	134.39				47	133.56	180.44
	48	205.23	62.05			IFU_3	48	251.49	59.09
qPCR230203	49	124.41	43.22				49	278.59	72.08	IFU_3
	50	102.71	62.54				50	212.76	99.23
	51	88.32	36.16				51		53.87
	52	91.58	58.92				52		130.2
	53		79.01				53
	54		57.03				54
	55		164.91	qPCR230203				185.618	82.9908	2.23661
	56		146.13						1.3304e-13
	57		134.74
	58		100.55
		153.788	62.1274	2.47537
			5.79811e-17
