# Supplementary material for: The second messenger signaling molecule cyclic di-AMP drives developmental cycle progression in Chlamydia trachomatis
Source: eLife. 2025 Sep 10;14:RP104240. doi: 10.7554/eLife.104240 (PMC12422730; doi:10.7554/eLife.104240)
Supplement: Figure 5—figure supplement 2—source data 1. [file elife-104240-fig5-figsupp2-data1.xlsx]

## Sheet: dacAop_Spec
dacA				Average
	10	14	24		10	14	24
UI-1	0.102787	0.129397	0.0927248	UI	0.0866903	0.126083	0.0886421
UI-2	0.0677229	0.136863	0.113983	I	0.0866903	0.498189	0.341037
UI-3	0.0895612	0.111988	0.0592181
				STDEV
I-1	0.102787	0.415692	0.438102		10	14	24
I-2	0.0677229	0.359592	0.395269	UI	0.0177073	0.0127648	0.02761
I-3	0.0895612	0.719284	0.189738	I	0.0177073	0.193517	0.132767
				P-value	10	14	24
					1	0.029289	0.0321669
ybbR				Average
	10	14	24		10	14	24
UI-1	0.066894	0.0878873	0.0646565	UI	0.0687445	0.0938355	0.0633521
UI-2	0.0777617	0.110636	0.0835526	I	0.0687445	0.21778	0.15843
UI-3	0.0615778	0.0829831	0.0418471
				STDEV
I-1	0.066894	0.193499	0.20802		10	14	24
I-2	0.0777617	0.143166	0.18105	UI	0.00824913	0.0147548	0.0208833
I-3	0.0615778	0.316677	0.08622	I	0.00824913	0.0892676	0.0639731
				P-value	10	14	24
					1	0.0765958	0.0706641
omcB				Average
	10	14	24		10	14	24
UI-1	0.00456032	0.00457177	0.0452076	UI	0.00323921	0.00416839	0.0616324
UI-2	0.00219138	0.0045927	0.0967489	I	0.00323921	0.00529432	0.0879728
UI-3	0.00296593	0.0033407	0.0429407
				STDEV
I-1	0.00456032	0.00451864	0.0857047		10	14	24
I-2	0.00219138	0.00431322	0.121749	UI	0.00120788	0.000716881	0.0304329
I-3	0.00296593	0.00705109	0.0564643	I	0.00120788	0.00152487	0.0327015
				P-value	10	14	24
					1	0.311522	0.364856
hctA				Average
	10	14	24		10	14	24
UI-1	0.00942797	0.00637953	0.326599	UI	0.00738706	0.00874743	0.354421
UI-2	0.00543928	0.0106226	0.494174	I	0.00738706	0.102188	0.236377
UI-3	0.00729393	0.00924019	0.24249
				STDEV
I-1	0.00942797	0.0610042	0.280833		10	14	24
I-2	0.00543928	0.0851062	0.302614	UI	0.00199598	0.00216401	0.128128
I-3	0.00729393	0.160452	0.125683	I	0.00199598	0.0518777	0.0964802
				P-value	10	14	24
					1	0.0356301	0.271412
euo				Average
	10	14	24		10	14	24
UI-1	0.0732579	0.0572295	0.0228874	UI	0.061117	0.0544975	0.0260119
UI-2	0.0492459	0.0623609	0.0362731	I	0.061117	0.0354447	0.0328264
UI-3	0.0608472	0.0439022	0.0188751
				STDEV
I-1	0.0732579	0.0436439	0.039081		10	14	24
I-2	0.0492459	0.0224216	0.041834	UI	0.0120083	0.0095278	0.00911011
I-3	0.0608472	0.0402687	0.0175643	I	0.0120083	0.0114039	0.0132889
				P-value	10	14	24
					1	0.0905413	0.504428
gDNA				Average
	10	14	24		10	14	24
UI-1	0.0654523	0.124115	2.92663	UI	0.045664	0.125616	2.33037
UI-2	0.0394118	0.142759	2.09396	I	0.045664	0.105664	1.06916
UI-3	0.032128	0.109975	1.97052
				STDEV
I-1	0.0654523	0.137927	1.2243		10	14	24
I-2	0.0394118	0.104589	0.810033	UI	0.0175198	0.0164437	0.520055
I-3	0.032128	0.0744757	1.17316	I	0.0175198	0.031739	0.225866
				P-value	10	14	24
					1	0.3884	0.0182592
