# Supplementary material for: The second messenger signaling molecule cyclic di-AMP drives developmental cycle progression in Chlamydia trachomatis
Source: eLife. 2025 Sep 10;14:RP104240. doi: 10.7554/eLife.104240 (PMC12422730; doi:10.7554/eLife.104240)
Supplement: Figure 5—source data 1. [file elife-104240-fig5-data1.xlsx]

## Sheet: dacAop - IFU
pBOMBL-dacA-ybbR_6xH
	24 hpi (UI)	24 hpi (UI)	24 hpi (I)	24 hpi (I)	24 hpi (UI)	24 hpi (UI)	24 hpi (I)	24 hpi (I)	24 hpi (UI)	24 hpi (UI)	24 hpi (I)	24 hpi (I)
#1	32	27	19	16	25	27	13	13	29	27	8	16
#2	22	44	22	12	18	29	12	17	37	25	14	20
#3	30	29	18	12	33	22	11	18	33	30	16	15
#4	27	22	17	22	19	16	5	10	25	27	15	19
#5	29	16	14	13	25	26	8	15	29	26	18	20
#6	23	31	14	15	25	28	9	11	24	23	22	21
#7	22	23	14	19	16	29	12	5	28	29	16	18
#8	21	19	18	11	26	24	7	13	35	25	17	12
#9	26	30	20	16	16	19	8	12	30	19	19	13
#10	25	13	19	17	15	25	10	10	31	21	17	15
#11	29	25	14	10	15	20	13	11	28	32	14	12
#12	27	27	15	15	12	23	16	15	22	28	22	15
#13	26	22	15	22	18	27	5	8	28	38	18	18
#14	22	18	19	14	17	20	6	7	35	29	23	19
#15	20	26	21	19	22	19	5	8	25	32	25	14
Dilution	10^-3	10^-3	10^-3	10^-3	10^-3	10^-3	10^-3	10^-3	10^-3	10^-3	10^-3	10^-3
average (inclusions/FOV)	25.4	24.8	17.2667	15.5333	20.1333	23.6	9.33333	11.5333	29.2667	27.4	17.6	16.4667
IFU (/ml/well)	2.42968e+07		1.58752e+07		2.11669e+07		1.00995e+07		2.74267e+07		1.64883e+07

## Sheet: dacAopMut - IFU
pBOMBL-dacAD164N-ybbR_6xH
	24 hpi (UI)	24 hpi (UI)	24 hpi (I)	24 hpi (I)	24 hpi (UI)	24 hpi (UI)	24 hpi (I)	24 hpi (I)	24 hpi (UI)	24 hpi (UI)	24 hpi (I)	24 hpi (I)
#1	9	19	9	8	13	8	6	13	8	19	6	8
#2	13	12	12	7	18	14	11	10	8	20	8	8
#3	19	13	6	5	11	15	17	15	11	14	9	13
#4	20	11	11	6	15	10	11	4	8	11	12	14
#5	14	13	9	8	11	4	13	11	7	6	16	11
#6	12	18	12	7	7	12	13	12	6	9	14	12
#7	12	19	7	10	14	13	13	16	13	12	17	12
#8	12	14	8	8	14	10	17	18	7	8	7	7
#9	12	13	9	9	13	11	9	18	12	9	13	8
#10	8	21	8	15	16	11	10	19	12	14	19	10
#11	16	7	8	6	10	8	10	13	15	16	7	6
#12	15	13	6	8	8	12	9	14	9	14	10	10
#13	15	9	8	5	8	7	8	18	9	11	9	14
#14	12	6	6	6	12	7	7	10	18	13	8	9
#15	15	13	7	8	10	8	5	11	13	11	10	8
Dilution	10^-3	10^-3	10^0	10^0	10^-3	10^-3	10^0	10^0	10^-3	10^-3	10^0	10^0
average (inclusions/FOV)	13.6	13.4	8.4	7.73333	12	10	10.6	13.4667	10.4	12.4667	11	10
IFU (/ml/well)	13068000		7808.53		10648000		11648.3		1.10675e+07		10164

## Sheet: dacAop - RT-qPCR
dacA				Average
	10	14	24		10	14	24
UI-1	0.102787	0.129397	0.0927248	UI	0.0866903	0.126083	0.0886421
UI-2	0.0677229	0.136863	0.113983	I	0.0866903	0.498189	0.341037
UI-3	0.0895612	0.111988	0.0592181
				STDEV
I-1	0.102787	0.415692	0.438102		10	14	24
I-2	0.0677229	0.359592	0.395269	UI	0.0177073	0.0127648	0.02761
I-3	0.0895612	0.719284	0.189738	I	0.0177073	0.193517	0.132767
				P-value	10	14	24
					1	0.029289	0.0321669
ybbR				Average
	10	14	24		10	14	24
UI-1	0.066894	0.0878873	0.0646565	UI	0.0687445	0.0938355	0.0633521
UI-2	0.0777617	0.110636	0.0835526	I	0.0687445	0.21778	0.15843
UI-3	0.0615778	0.0829831	0.0418471
				STDEV
I-1	0.066894	0.193499	0.20802		10	14	24
I-2	0.0777617	0.143166	0.18105	UI	0.00824913	0.0147548	0.0208833
I-3	0.0615778	0.316677	0.08622	I	0.00824913	0.0892676	0.0639731
				P-value	10	14	24
					1	0.0765958	0.0706641
omcB				Average
	10	14	24		10	14	24
UI-1	0.00456032	0.00457177	0.0452076	UI	0.00323921	0.00416839	0.0616324
UI-2	0.00219138	0.0045927	0.0967489	I	0.00323921	0.00529432	0.0879728
UI-3	0.00296593	0.0033407	0.0429407
				STDEV
I-1	0.00456032	0.00451864	0.0857047		10	14	24
I-2	0.00219138	0.00431322	0.121749	UI	0.00120788	0.000716881	0.0304329
I-3	0.00296593	0.00705109	0.0564643	I	0.00120788	0.00152487	0.0327015
				P-value	10	14	24
					1	0.311522	0.364856
hctA				Average
	10	14	24		10	14	24
UI-1	0.00942797	0.00637953	0.326599	UI	0.00738706	0.00874743	0.354421
UI-2	0.00543928	0.0106226	0.494174	I	0.00738706	0.102188	0.236377
UI-3	0.00729393	0.00924019	0.24249
				STDEV
I-1	0.00942797	0.0610042	0.280833		10	14	24
I-2	0.00543928	0.0851062	0.302614	UI	0.00199598	0.00216401	0.128128
I-3	0.00729393	0.160452	0.125683	I	0.00199598	0.0518777	0.0964802
				P-value	10	14	24
					1	0.0356301	0.271412
euo				Average
	10	14	24		10	14	24
UI-1	0.0732579	0.0572295	0.0228874	UI	0.061117	0.0544975	0.0260119
UI-2	0.0492459	0.0623609	0.0362731	I	0.061117	0.0354447	0.0328264
UI-3	0.0608472	0.0439022	0.0188751
				STDEV
I-1	0.0732579	0.0436439	0.039081		10	14	24
I-2	0.0492459	0.0224216	0.041834	UI	0.0120083	0.0095278	0.00911011
I-3	0.0608472	0.0402687	0.0175643	I	0.0120083	0.0114039	0.0132889
				P-value	10	14	24
					1	0.0905413	0.504428
gDNA				Average
	10	14	24		10	14	24
UI-1	0.0654523	0.124115	2.92663	UI	0.045664	0.125616	2.33037
UI-2	0.0394118	0.142759	2.09396	I	0.045664	0.105664	1.06916
UI-3	0.032128	0.109975	1.97052
				STDEV
I-1	0.0654523	0.137927	1.2243		10	14	24
I-2	0.0394118	0.104589	0.810033	UI	0.0175198	0.0164437	0.520055
I-3	0.032128	0.0744757	1.17316	I	0.0175198	0.031739	0.225866
				P-value	10	14	24
					1	0.3884	0.0182592
Copy #				Average
	10	14	24		10	14	24
UI-1	58306.7	110565	2.60713e+06	UI	40678.8	111902	2.07596e+06
UI-2	35109.2	127174	1.86535e+06	I	40678.8	94128.3	952441
UI-3	28620.5	97968.5	1.75539e+06
				STDEV
I-1	58306.7	122869	1.09064e+06		10	14	24
I-2	35109.2	93171.1	721600	UI	15607.2	14648.5	463279
I-3	28620.5	66345.1	1.04509e+06	I	15607.2	28274	201208
				P-value	10	14	24
					1	0.3884	0.0182592

## Sheet: dacAopMut RT-qPCR
dacA				Average
	10	14	24		10	14	24
UI-1	0.117943	0.391047	0.127208	UI	0.0694658	0.168072	0.0864466
UI-2	0.0674339	0.0294523	0.0958343	I	0.0694658	1.63343	1.31308
UI-3	0.02302	0.0837179	0.0362973
UI-4				STDEV
I-1	0.117943	2.79079	1.15572		10	14	24
I-2	0.0674339	0.815643	1.04422	UI	0.0474943	0.194999	0.0461767
I-3	0.02302	1.29387	1.73931	I	0.0474943	1.03043	0.373313
I-4				P-value	10	14	24
					1	0.0727488	0.00483967
ybbR				Average
	10	14	24		10	14	24
UI-1	0.0590512	0.329069	0.0508067	UI	0.0417937	0.140764	0.0566018
UI-2	0.0484204	0.0259683	0.0917219	I	0.0417937	0.689391	0.322695
UI-3	0.0179096	0.0672559	0.0272767
UI-4				STDEV
I-1	0.0590512	1.26985	0.321983		10	14	24
I-2	0.0484204	0.326338	0.259072	UI	0.0213563	0.164378	0.0326111
I-3	0.0179096	0.471984	0.387029	I	0.0213563	0.50794	0.0639815
I-4				P-value	10	14	24
					1	0.149701	0.00302953
omcB				Average
	10	14	24		10	14	24
UI-1	0.0106543	0.0157926	0.128535	UI	0.00493303	0.00678141	0.112073
UI-2	0.00260527	0.00171652	0.152891	I	0.00493303	0.00446291	0.0252261
UI-3	0.00153949	0.00283506	0.0547923
UI-4				STDEV
I-1	0.0106543	0.00781281	0.0251627		10	14	24
I-2	0.00260527	0.00239331	0.0302889	UI	0.00498337	0.00782397	0.0510794
I-3	0.00153949	0.00318261	0.0202267	I	0.00498337	0.00292782	0.00503139
I-4				P-value	10	14	24
					1	0.655834	0.0427836
hctA				Average
	10	14	24		10	14	24
UI-1	0.0690223	0.0232432	0.34225	UI	0.027933	0.0116989	0.359769
UI-2	0.0108028	0.00331589	0.530878	I	0.027933	0.00499213	0.0924282
UI-3	0.00397376	0.00853758	0.206178
UI-4				STDEV
I-1	0.0690223	0.00671075	0.0859545		10	14	24
I-2	0.0108028	0.00351025	0.0867579	UI	0.0357479	0.0103329	0.163058
I-3	0.00397376	0.00475539	0.104572	I	0.0357479	0.00161333	0.0105247
I-4				P-value	10	14	24
					1	0.32894	0.047159
euo				Average
	10	14	24		10	14	24
UI-1	0.176614	0.187202	0.0242841	UI	0.0844838	0.0836446	0.0239502
UI-2	0.0418761	0.0227461	0.0268825	I	0.0844838	0.0705855	0.13129
UI-3	0.0349608	0.0409855	0.020684
UI-4				STDEV
I-1	0.176614	0.0960486	0.0936736		10	14	24
I-2	0.0418761	0.0378729	0.210279	UI	0.0798624	0.0901459	0.00311274
I-3	0.0349608	0.0778351	0.0899181	I	0.0798624	0.0297577	0.0684318
I-4				P-value	10	14	24
					1	0.823381	0.0533146
gDNA				Average
	10	14	24		10	14	24
UI-1	0.00543541	0.0464316	2.54593	UI	0.0398201	0.140397	2.33227
UI-2	0.0453896	0.279335	1.67369	I	0.0398201	0.107522	0.293544
UI-3	0.0686354	0.095423	2.7772
UI-4				STDEV
I-1	0.00543541	0.0749025	0.216717		10	14	24
I-2	0.0453896	0.168961	0.27228	UI	0.031966	0.122792	0.581949
I-3	0.0686354	0.0787011	0.391635	I	0.031966	0.0532421	0.0893766
I-4				P-value	10	14	24
					1	0.692402	0.00388839
Copy #				Average
	10	14	24		10	14	24
UI-1	4842.01	41362.6	2.26798e+06	UI	35472.9	125069	2.07765e+06
UI-2	40434.4	248840	1.49097e+06	I	35472.9	95783.2	261497
UI-3	61142.3	85005.5	2.474e+06
UI-4				STDEV
I-1	4842.01	66725.3	193057		10	14	24
I-2	40434.4	150515	242555	UI	28476.2	109387	518416
I-3	61142.3	70109.1	348879	I	28476.2	47429.5	79619.1
I-4				P-value	10	14	24
					1	0.692402	0.00388839
