# Supplementary material for: The second messenger signaling molecule cyclic di-AMP drives developmental cycle progression in Chlamydia trachomatis
Source: eLife. 2025 Sep 10;14:RP104240. doi: 10.7554/eLife.104240 (PMC12422730; doi:10.7554/eLife.104240)
Supplement: Figure 7—source data 1. [file elife-104240-fig7-data1.xlsx]

## Sheet: dacAop
pBOMBL-dacA-ybbR_6xH
	24 hpi (UI)	24 hpi (UI)	24 hpi (I)	24 hpi (I)	32 hpi (UI)	32 hpi (UI)	32 hpi (I)	32 hpi (I)	48 hpi (UI)	48 hpi (UI)	48 hpi (I)	48 hpi (I)			10	16	18	20	22	24	32	48
#1	4	8	4	7	8	21	11	17	7	8	3	5		UI	0	0	6603.91	360311	2.66415e+06	2.39634e+07	2.04463e+08	9.85747e+08
#2	3	5	5	3	7	22	10	14	6	8	2	5		I	0	0	223285	808818	3.30841e+06	1.38101e+07	3.23204e+07	4.46356e+07
#3	2	4	8	3	9	9	8	14	6	6	5	4
#4	5	8	4	8	14	11	13	13	8	7	2	3
#5	11	4	6	4	5	14	11	16	11	7	3	4
#6	7	4	6	4	10	9	9	9	11	9	2	2
#7	11	5	2	3	10	15	5	19	9	6	3	4
#8	9	2	3	5	17	13	12	17	7	8	4	4
#9	9	7	4	4	17	15	19	19	7	6	3	2
#10	4	5	5	2	11	11	14	10	6	7	3	4
#11	7	4	2	4	18	23	15	10	8	6	4	3
#12	8	6	2	8	16	27	7	8	9	7	2	4
#13	6	7	4	3	13	21	11	11	6	7	2	4
#14	6	6	9	4	15	10	10	9	12	7	3	5
#15	12	5	5	7	9	11	15	12	7	8	5	3
Dilution	10^-3	10^-3	10^-3	10^-3	10^-4	10^-4	10^-3	10^-3	10^-5	10^-5	10^-4	10^-4
average (inclusions/FOV)	6.93333	5.33333	4.6	4.6	11.9333	15.4667	11.3333	13.2	8	7.13333	3.06667	3.73333
IFU (/ml/well)	5.93707e+06		4.4528e+06		132616000		1.18741e+07		7.32453e+08		32912000
1st
pBOMBL-dacA-ybbR_6xH
	18 hpi (UI)	18 hpi (UI)	18 hpi (I)	18 hpi (I)	20 hpi (UI)	20 hpi (UI)	20 hpi (I)	20 hpi (I)	22 hpi (UI)	22 hpi (UI)	22 hpi (I)	22 hpi (I)
#1	7	5	21	18	1	5	9	11	4	5	2	4
#2	11	4	11	15	3	4	8	6	2	2	4	4
#3	3	8	16	13	2	4	8	6	5	3	7	3
#4	8	11	12	15	3	2	9	9	4	3	2	7
#5	7	4	20	12	3	3	10	9	4	4	2	4
#6	9	5	13	12	4	3	11	7	6	3	2	6			18hpi	20hpi	22hpi	24hpi	32hpi	48hpi
#7	7	10	18	17	3	4	11	6	2	2	4	3		UI1	6517.87	358160	3.7752e+06	24006400	132616000	7.32453e+08
#8	4	4	16	12	4	5	14	8	4	4	4	4		UI2	6776	367840	1.88115e+06	2.08443e+07	2.41355e+08	886688000
#9	8	7	15	22	3	3	5	8	8	4	3	2		UI3	6517.87	354933	2.33611e+06	2.70395e+07	2.39419e+08	1.3381e+09
#10	10	8	10	18	3	4	16	6	3	2	5	4		I1	149395	906693	3.90427e+06	1.54235e+07	1.18741e+07	32912000
#11	6	4	14	14	3	2	7	9	3	5	4	5		I2	295563	945413	3.11051e+06	9776800	3.63645e+07	4.71093e+07
#12	5	6	13	15	3	4	9	10	8	4	2	4		I3	224899	574347	2.91045e+06	1.62301e+07	4.87227e+07	5.38853e+07
#13	5	8	18	19	9	6	7	14	4	5	3	7		Average	18	20	22	24	32	48
#14	8	7	18	14	5	5	12	13	3	4	3	8		UI	6603.91	360311	2.66415e+06	2.39634e+07	2.04463e+08	9.85747e+08
#15	7	6	20	12	3	5	12	11	3	4	5	4		I	223285	808818	3.30841e+06	1.38101e+07	3.23204e+07	4.46356e+07
Dilution	10^0	10^0	10^-1	10^-1	10^-2	10^-2	10^-2	10^-2	10^-3	10^-3	10^-3	10^-3		STDEV	18	20	22	24	32	48
average (inclusions/FOV)	7	6.46667	15.6667	15.2	3.46667	3.93333	9.86667	8.86667	4.2	3.6	3.46667	4.6		UI	149.033	6716.84	988721	3.09782e+06	6.2229e+07	3.1474e+08
IFU (/ml/well)	6517.87		149395		358160		906693		3.7752e+06		3.90427e+06			I	73097.4	203979	525633	3.51618e+06	1.87542e+07	1.07033e+07
2nd														p-value	0.00681824	0.0189996	0.375388	0.0198996	0.0101257	0.00662427
pBOMBL-dacA-ybbR_6xH
	18 hpi (UI)	18 hpi (UI)	18 hpi (I)	18 hpi (I)	20 hpi (UI)	20 hpi (UI)	20 hpi (I)	20 hpi (I)	22 hpi (UI)	22 hpi (UI)	22 hpi (I)	22 hpi (I)
#1	7	5	25	31	6	4	7	10	7	31	27	33
#2	5	9	30	29	3	3	9	9	11	16	47	29
#3	8	5	29	30	10	6	7	7	7	20	38	25
#4	8	4	30	28	3	6	6	8	8	23	37	22
#5	7	10	38	35	3	4	9	8	12	28	32	37
#6	7	6	38	34	4	5	6	12	13	35	23	23
#7	11	3	40	33	4	2	11	9	15	41	19	40
#8	5	3	24	39	2	2	7	16	11	19	39	37
#9	10	8	29	26	3	3	12	7	13	20	22	33
#10	6	10	28	30	4	3	14	14	10	31	31	35
#11	7	9	29	23	5	2	10	10	19	22	34	40
#12	7	6	28	24	3	6	13	11	23	29	41	31
#13	7	6	38	30	3	3	11	13	14	22	18	35
#14	7	8	28	21	4	2	10	5	18	30	40	35
#15	6	10	37	32	4	2	11	11	9	26	29	32
Dilution	10^0	10^0	10^-1	10^-1	10^-2	10^-2	10^-2	10^-2	10^-2	10^-2	10^-2	10^-2
average (inclusions/FOV)	7.2	6.8	31.4	29.6667	4.06667	3.53333	9.53333	10	12.6667	26.2	31.8	32.4667
IFU (/ml/well)	6776		295563		367840		945413		1.88115e+06		3.11051e+06
3rd
pBOMBL-dacA-ybbR_6xH
	18 hpi (UI)	18 hpi (UI)	18 hpi (I)	18 hpi (I)	20 hpi (UI)	20 hpi (UI)	20 hpi (I)	20 hpi (I)	22 hpi (UI)	22 hpi (UI)	22 hpi (I)	22 hpi (I)
#1	4	5	19	28	3	3	5	9	39	40	22	30
#2	5	4	21	16	8	4	3	9	27	39	29	32
#3	6	8	24	23	4	3	4	7	13	30	26	31
#4	7	8	23	24	4	4	5	6	10	30	36	18
#5	5	11	28	27	4	4	6	6	18	19	28	37
#6	7	17	28	20	6	4	8	7	18	26	31	32
#7	4	6	30	23	2	3	5	5	20	20	25	35
#8	7	4	28	24	2	3	4	4	16	26	24	47
#9	4	6	27	20	4	2	2	6	23	21	36	32
#10	9	6	24	22	4	4	3	10	21	31	33	43
#11	7	5	31	26	4	4	4	8	27	24	42	34
#12	4	11	20	19	3	7	6	4	28	31	24	25
#13	6	8	18	25	2	2	7	4	23	24	25	26
#14	6	6	18	18	3	3	9	7	24	18	17	39
#15	9	7	21	22	3	4	10	5	19	19	20	23
Dilution	10^0	10^0	10^-1	10^-1	10^-2	10^-2	10^-2	10^-2	10^-2	10^-2	10^-2	10^-2
average (inclusions/FOV)	6	7.46667	24	22.4667	3.73333	3.6	5.4	6.46667	21.7333	26.5333	27.8667	32.2667
IFU (/ml/well)	6517.87		224899		354933		574347		2.33611e+06		2.91045e+06
					32 hpi (UI)	32 hpi (UI)	32 hpi (I)	32 hpi (I)	48 hpi (UI)	48 hpi (UI)	48 hpi (I)	48 hpi (I)
					21	25	35	44	89	84	4	3
					20	26	29	44	83	65	4	6
					17	36	39	33	107	80	5	3
					27	33	38	37	119	76	3	2
					24	28	32	43	100	85	14	3
					22	28	24	48	120	64	7	4
					29	26	27	47	130	74	5	4
					26	22	34	45	142	75	5	6
					24	25	29	44	129	69	9	5
					26	34	36	39	116	66	6	6
					18	27	36	36	123	95	2	4
					27	27	43	27	135	91	4	5
					32	30	51	29	103	88	3	3
					22	17	45	34	65	79	3	9
					14	15	41	38	42	54	4	5
					10^-4	10^-4	10^-3	10^-3	10^-4	10^-4	10^-4	10^-4
					23.2667	26.6	35.9333	39.2	106.867	76.3333	5.2	4.53333
					2.41355e+08		3.63645e+07		886688000		4.71093e+07
					32 hpi (UI)	32 hpi (UI)	32 hpi (I)	32 hpi (I)	48 hpi (UI)	48 hpi (UI)	48 hpi (I)	48 hpi (I)
					24	28	3	6	139	145	3	7
					25	22	2	5	113	147	4	5
					24	29	4	4	115	161	4	6
					18	23	3	3	116	159	9	9
					23	26	6	6	136	163	3	5
					22	30	7	6	111	134	4	7
					17	29	5	5	134	154	7	8
					24	27	7	4	141	159	4	6
					27	28	4	9	129	113	7	8
					28	31	5	4	148	132	2	5
					31	20	5	5	133	121	5	7
					20	23	8	3	147	98	4	4
					28	29	5	5	172	107	6	4
					18	17	7	4	165	140	5	6
					31	20	6	5	185	130	9	4
					10^-4	10^-4	10^-4	10^-4	10^-4	10^-4	10^-4	10^-4
					24	25.4667	5.13333	4.93333	138.933	137.533	5.06667	6.06667
					2.39419e+08		4.87227e+07		1.3381e+09		5.38853e+07

## Sheet: dacAKD
pL12CRia(dacA-IGR)
	24 hpi (UI)	24 hpi (UI)	24 hpi (I)	24 hpi (I)	24 hpi (UI)	24 hpi (UI)	24 hpi (I)	24 hpi (I)	24 hpi (UI)	24 hpi (UI)	24 hpi (I)	24 hpi (I)
#1	3	2	4	2	3	6	5	4	5	5	4	5
#2	7	5	3	3	5	5	2	2	3	6	2	3
#3	5	3	1	3	4	3	4	4	4	4	4	3
#4	2	3	5	8	5	6	2	3	4	8	3	2
#5	7	3	3	2	6	4	2	3	6	6	4	5
#6	6	6	4	3	5	4	2	2	4	4	2	5
#7	4	6	6	2	6	7	2	3	4	3	2	3
#8	5	5	7	5	4	6	3	3	2	6	4	5
#9	3	4	4	5	4	7	3	2	4	6	6	3
#10	2	6	3	4	6	7	5	4	3	4	4	6
#11	4	4	3	5	6	9	4	2	5	5	4	2
#12	4	7	5	4	8	10	4	5	6	3	5	4
#13	3	7	2	3	7	11	2	4	8	4	4	4
#14	4	8	4	4	5	6	3	4	4	4	2	3
#15	6	7	5	6	5	6	4	2	4	3	5	4
Dilution	10^-2	10^-2	10^0	10^0	10^-2	10^-2	10^0	10^0	10^-2	10^-2	10^0	10^0
average (inclusions/FOV)	4.33333	5.06667	3.93333	3.93333	5.26667	6.46667	3.13333	3.13333	4.4	4.73333	3.66667	3.8
IFU (/ml/well)	454960		3807.47		567893		3033.07		442053		3613.87
1st
pL12CRia(dacA-IGR)
	18 hpi (UI)	18 hpi (UI)	18 hpi (I)	18 hpi (I)	20 hpi (UI)	20 hpi (UI)	20 hpi (I)	20 hpi (I)	22 hpi (UI)	22 hpi (UI)	22 hpi (I)	22 hpi (I)
#1	1	1			4	8			16	14	2	3
#2	1	1			10	13			13	17	6	3
#3	1	2			9	9			11	14	3	3
#4	1	2			11	15			15	17	2	5
#5	1	1			13	14			18	16	5	2		dacA-KD One Time Growth Curve
#6	1	1			8	13			13	18	2	5			18hpi	20hpi	22hpi	24hpi	32hpi	48hpi
#7	1	2			8	8			9	17	4	3		UI1	1290.67	10002.7	137456	454960	28265600	7.32453e+07
#8	1	1			11	11			10	12	3	8		UI2	1258.4	8970.13	136811	567893	24780800	67760000
#9	1	1			9	10			9	14	2	4		UI3	1258.4	8002.13	105835	442053	23425600	9.06693e+07
#10	3	1			7	8			14	23	4	4		I1			3355.73	3807.47	33331.5	58080
#11	1	1			8	13			10	15	3	3		I2			2871.73	3033.07	19360	35170.7
#12	1	1			9	10			14	17	2	3		I3			2484.53	3613.87	28910.9	37429.3
#13	2	2			11	17			16	12	3	3		Average	18	20	22	24	32	48
#14	2	2			8	11			14	18	5	2		UI	1269.16	8991.64	126700	488302	2.54907e+07	7.72249e+07
#15	1	2			9	15			6	14	2	5		I	#DIV/0!	#DIV/0!	2904	3484.8	27200.8	43560
Dilution	10^0	10^0	10^0	10^0	10^0	10^0	10^-0	10^-0	10^-1	10^-1	10^0	10^0		STDEV	18	20	22	24	32	48
average (inclusions/FOV)	1.26667	1.4	#DIV/0!	#DIV/0!	9	11.6667	#DIV/0!	#DIV/0!	12.5333	15.8667	3.2	3.73333		UI	18.6292	1000.44	18073.2	69229.4	2.49686e+06	1.19619e+07
IFU (/ml/well)	1290.67		#DIV/0!		10002.7		#DIV/0!		137456		3355.73			I	#DIV/0!	#DIV/0!	436.495	403.011	7141	12625.3
2nd														p-value	#DIV/0!	#DIV/0!	0.000289344	0.000265069	6.03396e-05	0.000364945
pL12CRia(dacA-IGR)
	18 hpi (UI)	18 hpi (UI)	18 hpi (I)	18 hpi (I)	20 hpi (UI)	20 hpi (UI)	20 hpi (I)	20 hpi (I)	22 hpi (UI)	22 hpi (UI)	22 hpi (I)	22 hpi (I)
#1	1	1			12	5			19	10	2	5
#2	2	3			11	7			10	15	3	2
#3	2	1			8	6			10	11	4	4
#4	2	1			10	14			13	13	2	3
#5	1	1			10	11			17	13	3	2
#6	1	2			8	11			19	17	2	2
#7	1	1			8	13			17	18	2	2
#8	1	1			9	8			15	13	3	1
#9	3	1			6	9			7	13	2	5
#10	1	1			10	6			17	16	4	2
#11	1	1			9	12			17	12	6	3
#12	1	1			13	11			11	14	2	1
#13	1	1			11	10			19	15	4	3
#14	1	2			5	9			10	13	3	6
#15	1	1			8	8			14	16	3	3
Dilution	10^0	10^0	10^0	10^0	10^0	10^0	10^-0	10^-0	10^-1	10^-1	10^0	10^0
average (inclusions/FOV)	1.33333	1.26667	#DIV/0!	#DIV/0!	9.2	9.33333	#DIV/0!	#DIV/0!	14.3333	13.9333	3	2.93333
IFU (/ml/well)	1258.4		#DIV/0!		8970.13		#DIV/0!		136811		2871.73
3rd
pL12CRia(dacA-IGR)
	18 hpi (UI)	18 hpi (UI)	18 hpi (I)	18 hpi (I)	20 hpi (UI)	20 hpi (UI)	20 hpi (I)	20 hpi (I)	22 hpi (UI)	22 hpi (UI)	22 hpi (I)	22 hpi (I)
#1	1	1			10	10			16	14	3	2
#2	1	1			9	6			7	11	3	2
#3	2	1			5	8			12	8	2	1
#4	2	1			12	4			9	10	2	3
#5	1	1			9	5			13	10	2	2
#6	1	1			8	8			7	9	3	2
#7	1	1			9	11			11	6	2	3
#8	2	1			9	15			11	12	3	1
#9	1	2			9	4			10	7	3	3
#10	1	1			6	9			14	15	2	4
#11	2	1			8	5			9	9	3	3
#12	1	3			7	8			12	9	2	2
#13	1	1			6	10			14	11	3	2
#14	1	2			6	6			12	17	2	4
#15	2	1			15	11			9	14	4	4
Dilution	10^0	10^0	10^0	10^0	10^0	10^0	10^-0	10^-0	10^-1	10^-1	10^0	10^0
average (inclusions/FOV)	1.33333	1.26667	#DIV/0!	#DIV/0!	8.53333	8	#DIV/0!	#DIV/0!	11.0667	10.8	2.6	2.53333
IFU (/ml/well)	1258.4		#DIV/0!		8002.13		#DIV/0!		105835		2484.53
					32 hpi (UI)	32 hpi (UI)	32 hpi (I)	32 hpi (I)	48 hpi (UI)	48 hpi (UI)	48 hpi (I)	48 hpi (I)
					28	22	24	32	6	9	5	10
					28	28	29	40	5	11	7	8
					33	33	31	30	5	7	7	10
					21	31	30	27	10	8	3	6
					27	22	29	33	9	10	5	4
					34	36	33	39	15	7	5	3
					26	31	39	47	10	6	10	5
					35	26	37	36	8	9	4	3
					30	19	29	36	5	9	5	4
					29	29	41	25	4	5	3	5
					33	30	29	41	7	6	4	5
					26	29	34	31	3	8	9	10
					26	27	41	34	5	7	5	7
					32	30	37	42	10	8	6	7
					42	33	40	37	7	8	7	8
					10^-3	10^-3	10^0	10^0	10^-4	10^-4	10^-1	10^-1
					30	28.4	33.5333	35.3333	7.26667	7.86667	5.66667	6.33333
					28265600		33331.5		7.32453e+07		58080
					32 hpi (UI)	32 hpi (UI)	32 hpi (I)	32 hpi (I)	48 hpi (UI)	48 hpi (UI)	48 hpi (I)	48 hpi (I)
					28	23	16	14	13	3	4	4
					19	18	15	10	6	6	4	3
					26	23	17	13	11	7	3	4
					18	26	15	17	5	6	2	3
					21	22	21	25	3	4	3	2
					25	31	28	25	5	10	4	2
					36	23	18	17	5	6	2	5
					30	24	18	21	4	9	4	3
					28	19	25	17	5	5	4	4
					19	32	13	18	4	8	6	5
					32	29	27	19	4	8	3	4
					20	27	19	18	14	7	2	4
					31	30	20	33	6	10	5	3
					22	23	21	28	5	7	5	2
					24	39	16	36	8	16	7	3
					10^-3	10^-3	10^0	10^0	10^-4	10^-4	10^-1	10^-1
					25.2667	25.9333	19.2667	20.7333	6.53333	7.46667	3.86667	3.4
					24780800		19360		67760000		35170.7
					32 hpi (UI)	32 hpi (UI)	32 hpi (I)	32 hpi (I)	48 hpi (UI)	48 hpi (UI)	48 hpi (I)	48 hpi (I)
					25	29	28	23	9	12	3	3
					33	20	33	23	9	14	2	6
					20	30	31	26	6	12	3	3
					24	24	23	31	10	10	5	3
					27	27	29	30	6	9	5	5
					27	30	30	28	11	10	3	4
					30	38	35	28	10	8	4	3
					29	17	27	33	7	9	4	3
					17	19	47	28	8	17	4	4
					16	20	31	21	11	9	3	4
					29	22	26	27	9	8	6	5
					26	28	34	28	7	8	3	3
					22	24	30	31	6	10	6	4
					18	14	36	36	8	14	6	4
					21	20	32	31	7	7	3	2
					10^-3	10^-3	10^0	10^0	10^-4	10^-4	10^-1	10^-1
					24.2667	24.1333	31.4667	28.2667	8.26667	10.4667	4	3.73333
					23425600		28910.9		9.06693e+07		37429.3

## Sheet: dacAopMut
pBOMBL-dacAD164N-ybbR_6xH
	24 hpi (UI)	24 hpi (UI)	24 hpi (I)	24 hpi (I)	24 hpi (UI)	24 hpi (UI)	24 hpi (I)	24 hpi (I)	24 hpi (UI)	24 hpi (UI)	24 hpi (I)	24 hpi (I)
#1	9	19	9	8	13	8	6	13	8	19	6	8
#2	13	12	12	7	18	14	11	10	8	20	8	8
#3	19	13	6	5	11	15	17	15	11	14	9	13
#4	20	11	11	6	15	10	11	4	8	11	12	14
#5	14	13	9	8	11	4	13	11	7	6	16	11
#6	12	18	12	7	7	12	13	12	6	9	14	12
#7	12	19	7	10	14	13	13	16	13	12	17	12
#8	12	14	8	8	14	10	17	18	7	8	7	7
#9	12	13	9	9	13	11	9	18	12	9	13	8
#10	8	21	8	15	16	11	10	19	12	14	19	10
#11	16	7	8	6	10	8	10	13	15	16	7	6
#12	15	13	6	8	8	12	9	14	9	14	10	10
#13	15	9	8	5	8	7	8	18	9	11	9	14
#14	12	6	6	6	12	7	7	10	18	13	8	9
#15	15	13	7	8	10	8	5	11	13	11	10	8
Dilution	10^-3	10^-3	10^0	10^0	10^-3	10^-3	10^0	10^0	10^-3	10^-3	10^0	10^0
average (inclusions/FOV)	13.6	13.4	8.4	7.73333	12	10	10.6	13.4667	10.4	12.4667	11	10
IFU (/ml/well)	13068000		7808.53		10648000		11648.3		1.10675e+07		10164
1st
pBOMBL-dacAD164N-ybbR_6xH
	18 hpi (UI)	18 hpi (UI)	18 hpi (I)	18 hpi (I)	20 hpi (UI)	20 hpi (UI)	20 hpi (I)	20 hpi (I)	22 hpi (UI)	22 hpi (UI)	22 hpi (I)	22 hpi (I)												11648.3		10164
#1	3	3	3	3	9	6	3	11	2	4	14	6
#2	4	5	2	2	13	9	6	5	7	9	7	13
#3	4	3	1	4	11	15	6	4	3	4	8	8
#4	5	3	1	2	9	11	6	4	6	5	5	6
#5	2	3	2	2	7	10	5	8	4	5	10	7		DacAD164NYbbR6xH One Time Growth Curve
#6	7	4	2	2	7	14	8	6	3	6	7	9			18hpi	20hpi	22hpi	24hpi	32hpi	48hpi
#7	6	2	3	3	8	11	5	6	5	3	8	5		UI1	3839.73	95509.3	4356000	13068000	367840000	6.06613e+08
#8	4	4	1	1	9	7	5	4	2	5	6	5		UI2	4420.53	131971	3.51707e+06	10648000	3.45253e+08	706640000
#9	5	4	2	1	9	8	6	7	2	3	4	9		UI3	4614.13	163915	4.29147e+06	1.10675e+07	3.64613e+08	6.32427e+08
#10	2	4	2	5	13	9	2	8	4	4	8	7		I1	2065.07	5937.07	6582.4	7808.53	11616	11196.5
#11	5	6	1	3	13	9	10	4	4	3	3	4		I2	2516.8	4807.73	11293.3	11648.3	9583.2	15907.5
#12	3	3	3	2	12	7	5	10	3	7	7	4		I3	2710.4	6550.13	7905.33	10164	9325.07	15358.9
#13	4	4	2	1	9	14	3	6	7	5	5	4		Average	18	20	22	24	32	48
#14	4	5	3	1	6	8	9	9	5	7	5	6		UI	4291.47	130465	4.05484e+06	1.15945e+07	3.59236e+08	648560000
#15	5	3	2	2	14	9	7	6	5	3	4	10		I	2430.76	5764.98	8593.69	9873.6	10174.8	14154.3
Dilution	10^0	10^0	10^0	10^0	10^-1	10^-1	10^-0	10^-0	10^-3	10^-3	10^0	10^0		STDEV	18	20	22	24	32	48
average (inclusions/FOV)	4.2	3.73333	2	2.26667	9.93333	9.8	5.73333	6.53333	4.13333	4.86667	6.73333	6.86667		UI	403.011	34227.5	466846	1.29322e+06	1.2216e+07	5.19283e+07
IFU (/ml/well)	3839.73		2065.07		95509.3		5937.07		4356000		6582.4			I	331.159	883.855	2429.73	1936.27	1254.81	2576.15
2nd														p-value	0.00348595	0.00322892	0.000114729	0.000100726	8.89275e-07	2.70147e-05
pBOMBL-dacAD164N-ybbR_6xH
	18 hpi (UI)	18 hpi (UI)	18 hpi (I)	18 hpi (I)	20 hpi (UI)	20 hpi (UI)	20 hpi (I)	20 hpi (I)	22 hpi (UI)	22 hpi (UI)	22 hpi (I)	22 hpi (I)
#1	2	3	2	2	17	13	3	8	8	3	8	6
#2	3	5	7	4	23	13	5	13	4	6	7	10
#3	5	3	1	4	15	16	5	3	5	6	14	10
#4	5	6	2	1	19	16	1	5	3	3	8	9
#5	7	6	1	3	21	13	2	2	5	2	18	17
#6	4	5	2	4	14	9	4	6	3	2	14	18
#7	5	3	1	2	15	9	6	8	5	2	9	18
#8	6	2	4	4	9	13	8	5	3	3	9	9
#9	5	5	3	2	9	10	5	2	4	3	8	15
#10	5	3	3	3	10	10	7	7	4	2	13	15
#11	5	7	2	3	13	11	3	3	6	5	8	15
#12	4	3	3	3	12	14	3	3	3	4	12	12
#13	2	5	2	3	9	14	5	5	3	2	7	22
#14	3	8	1	1	6	21	4	6	3	3	9	7
#15	6	6	4	1	16	19	5	7	2	2	9	14
Dilution	10^0	10^0	10^0	10^0	10^-1	10^-1	10^-0	10^-0	10^-3	10^-3	10^0	10^0
average (inclusions/FOV)	4.46667	4.66667	2.53333	2.66667	13.8667	13.4	4.4	5.53333	4.06667	3.2	10.2	13.1333
IFU (/ml/well)	4420.53		2516.8		131971		4807.73		3.51707e+06		11293.3
3rd
pBOMBL-dacAD164N-ybbR_6xH
	18 hpi (UI)	18 hpi (UI)	18 hpi (I)	18 hpi (I)	20 hpi (UI)	20 hpi (UI)	20 hpi (I)	20 hpi (I)	22 hpi (UI)	22 hpi (UI)	22 hpi (I)	22 hpi (I)
#1	4	4	1	7	10	13	5	6	4	4	11	7
#2	5	5	2	3	17	13	6	8	5	7	17	7
#3	2	4	2	7	21	15	5	5	3	2	5	5
#4	4	6	5	4	16	19	5	9	2	3	10	6
#5	6	3	1	3	20	16	3	7	5	6	5	6
#6	2	9	2	3	13	23	5	5	6	4	3	6
#7	5	4	5	1	16	17	7	10	4	2	11	11
#8	3	2	1	2	16	18	8	10	6	5	8	8
#9	3	10	1	2	20	17	5	7	5	6	15	7
#10	3	6	2	3	20	22	5	9	5	4	6	9
#11	4	4	4	4	17	13	7	9	4	7	9	8
#12	6	4	1	3	18	16	7	8	4	6	8	7
#13	6	8	5	2	8	19	10	9	3	4	9	12
#14	4	8	2	2	13	26	5	5	5	5	8	8
#15	6	3	2	2	17	19	6	7	4	3	4	9
Dilution	10^0	10^0	10^0	10^0	10^-1	10^-1	10^-0	10^-0	10^-3	10^-3	10^0	10^0
average (inclusions/FOV)	4.2	5.33333	2.4	3.2	16.1333	17.7333	5.93333	7.6	4.33333	4.53333	8.6	7.73333
IFU (/ml/well)	4614.13		2710.4		163915		6550.13		4.29147e+06		7905.33
					32 hpi (UI)	32 hpi (UI)	32 hpi (I)	32 hpi (I)	48 hpi (UI)	48 hpi (UI)	48 hpi (I)	48 hpi (I)
					4	3	7	21	3	6	4	16
					4	2	8	12	4	5	9	13
					4	2	9	11	3	6	6	10
					6	2	6	15	6	6	10	8
					1	5	6	13	8	5	6	12
					4	3	10	13	7	6	13	11
					2	5	9	9	8	8	10	10
					7	2	9	12	7	10	8	11
					5	2	17	7	6	3	15	8
					3	5	12	14	6	7	17	13
					3	2	16	17	9	3	15	14
					5	4	11	8	9	9	12	13
					4	7	15	16	6	7	14	12
					3	6	18	11	6	7	15	15
					5	4	12	16	7	5	13	14
					10^-5	10^-5	10^0	10^0	10^-5	10^-5	10^0	10^0
					4	3.6	11	13	6.33333	6.2	11.1333	12
					367840000		11616		6.06613e+08		11196.5
					32 hpi (UI)	32 hpi (UI)	32 hpi (I)	32 hpi (I)	48 hpi (UI)	48 hpi (UI)	48 hpi (I)	48 hpi (I)
					6	6	7	6	5	9	21	9
					2	2	9	4	9	17	13	5
					1	3	7	15	6	8	12	10
					3	3	10	7	8	2	13	9
					2	4	7	14	11	3	18	14
					3	2	12	14	9	5	16	14
					7	5	9	13	10	5	16	19
					5	4	4	16	6	5	21	19
					7	3	9	20	3	4	15	21
					2	2	11	14	6	6	17	24
					3	5	7	11	9	9	14	22
					3	4	9	5	9	12	20	21
					4	4	7	9	6	10	18	22
					4	2	8	11	6	8	15	12
					3	3	12	10	7	6	20	23
					10^-5	10^-5	10^0	10^0	10^-5	10^-5	10^0	10^0
					3.66667	3.46667	8.53333	11.2667	7.33333	7.26667	16.6	16.2667
					3.45253e+08		9583.2		706640000		15907.5
					32 hpi (UI)	32 hpi (UI)	32 hpi (I)	32 hpi (I)	48 hpi (UI)	48 hpi (UI)	48 hpi (I)	48 hpi (I)
					4	3	15	13	9	5	17	18
					3	6	10	7	6	3	13	12
					5	3	11	13	7	5	11	8
					2	5	14	8	6	7	9	14
					8	6	12	17	8	8	13	12
					3	5	6	10	4	9	9	15
					4	3	6	6	9	7	15	20
					5	2	8	15	8	8	9	20
					2	4	7	5	5	8	11	11
					5	2	11	9	4	7	14	18
					4	3	12	8	5	5	16	21
					1	4	7	8	9	11	12	23
					2	2	9	9	7	7	26	17
					4	7	8	11	4	7	24	20
					2	4	7	7	5	3	20	28
					10^-5	10^-5	10^0	10^0	10^-5	10^-5	10^0	10^0
					3.6	3.93333	9.53333	9.73333	6.4	6.66667	14.6	17.1333
					3.64613e+08		9325.07		6.32427e+08		15358.9
