# Supplementary material for: The second messenger signaling molecule cyclic di-AMP drives developmental cycle progression in Chlamydia trachomatis
Source: eLife. 2025 Sep 10;14:RP104240. doi: 10.7554/eLife.104240 (PMC12422730; doi:10.7554/eLife.104240)
Supplement: Supplementary file 1. [file elife-104240-supp1.xlsx]

## Sheet: Suppl File 1
	Supplementary File 1. Generalized representation of sequencing efficiency
	Parameter	Average per sample
	Number of reads	44028682
	Reads mapped to Ctr	260373
	% of reads mapped to Ctr	0.65
	% Ctr reads: protein coding	98.98
	% Ctr reads: rRNA	1.01
	Est. genome coverage (fold)a	24.8
	a Estimated genome coverage calculated by multiplying reads mapped to Chlamydia by 100 (bp per read), multiplying by % Ctr reads—protein coding and dividing by bp in the genome (1,038,842).
